# The key protein of endosomal mRNP transport binds translational landmark sites of cargo mRNAs

Lilli Olgeiser<sup>1</sup>, Carl Haag<sup>1</sup>, Susan Boerner<sup>2</sup>, Jernej Ule<sup>3</sup>, Anke Busch<sup>4</sup>, Julian König<sup>4</sup>,  
Michael Feldbrügge<sup>1, §</sup> and Kathi Zarnack<sup>2, §</sup>

**§ shared corresponding authorship**

<sup>1</sup> Heinrich Heine University Düsseldorf, Institute for Microbiology, Cluster of Excellence on Plant Sciences, 40204 Düsseldorf, Germany

<sup>2</sup> Buchmann Institute for Molecular Life Sciences (BMLS), Goethe University Frankfurt, Max-von-Laue-Str. 15, 60438 Frankfurt am Main, Germany

<sup>3</sup> Department of Molecular Neuroscience, UCL Institute of Neurology, Queen Square, London, WC1N3BG, UK

<sup>4</sup> Institute of Molecular Biology gGmbH, Ackermannweg 4, 55128 Mainz, Germany

**Running title:** Endosomal mRNP transport

**Key words:** endosome / fungus / iCLIP / microtubule / RNA-binding protein / RNA transport

**Characters:** 76,116

**\* Corresponding authors:**

**Dr. Michael Feldbrügge**

Institute for Microbiology, Cluster of Excellence on Plant Sciences

Heinrich Heine University Düsseldorf, Universitätsstr. 1, 40225 Düsseldorf, Germany

Phone: +49 (211) 81-15475

feldbrue@hhu.de

**Dr. Kathi Zarnack**

Buchmann Institute for Molecular Life Sciences (BMLS)

Goethe University Frankfurt, Max-von-Laue-Str. 15, 60438 Frankfurt am Main, Germany

Phone: + 49 (69) 798-42506

kathi.zarnack@bmls.de

1 **Abstract**

2 RNA-binding proteins (RBPs) determine spatiotemporal gene expression by mediating active  
3 transport and local translation of cargo mRNAs. Here, we cast a transcriptome-wide view on  
4 the transported mRNAs and cognate RBP binding sites during endosomal messenger  
5 ribonucleoprotein (mRNP) transport in *Ustilago maydis*. Using individual-nucleotide  
6 resolution UV crosslinking and immunoprecipitation (iCLIP), we compare the key transport  
7 RBP Rrm4 and the newly identified endosomal mRNP component Grp1 that is crucial to  
8 coordinate hyphal growth. Both RBPs bind predominantly in the 3' untranslated region of  
9 thousands of shared cargo mRNAs, often in close proximity. Intriguingly, Rrm4 specifically  
10 recognises landmark sites of translation, including precise binding of start and stop codons,  
11 suggesting an intimate connection of mRNA transport and translation. Towards uncovering  
12 the code of recognition, we identify UAUG as specific binding motif of Rrm4 that is bound  
13 by its third RRM domain. Altogether, we provide first insights into the positional organisation  
14 of co-localising RBPs on individual cargo mRNAs.

## 15 **Introduction**

16 All eukaryotic cells must accurately regulate the expression of proteins in time and space. To  
17 this end, many mRNAs accumulate at specific subcellular sites, and their local translation is  
18 exactly timed (Eliscovich & Singer, 2017, Holt & Bullock, 2009, Martin & Ephrussi, 2009).  
19 mRNA localisation is achieved most commonly by active motor-dependent transport along  
20 the cytoskeleton. Functional transport units are messenger ribonucleoprotein complexes  
21 (mRNPs), consisting of various RNA-binding proteins (RBPs), accessory proteins and cargo  
22 mRNAs. Key factors are RBPs that recognise localisation elements (LEs) within mRNAs. For  
23 movement, the RBPs either interact with motors directly or are connected via linker proteins  
24 (Holt & Bullock, 2009, Mofatteh & Bullock, 2017).

25 We discovered co-transport of mRNPs on the cytoplasmic surface of early endosomes as  
26 a novel translocation mechanism of cargo mRNAs during hyphal growth in fungi (Baumann,  
27 König et al., 2014, Baumann, Pohlmann et al., 2012). These endosomes shuttle along  
28 microtubules by the concerted action of plus-end directed kinesin and minus-end directed  
29 dynein (Egan, McClintock et al., 2012, Steinberg, 2014). They serve as multipurpose  
30 platforms functioning not only during endocytic recycling but also during long-distance  
31 transport of whole organelles such as peroxisomes (Guimaraes, Schuster et al., 2015, Haag,  
32 Pohlmann et al., 2017, Salogiannis, Egan et al., 2016, Salogiannis & Reck-Peterson, 2016).

33 Endosomal mRNA transport was uncovered analysing the RBP Rrm4 in the dimorphic  
34 phytopathogenic fungus *Ustilago maydis* (Fig. S1A; Haag, Steuten et al., 2015, Vollmeister &  
35 Feldbrügge, 2010). Loss of Rrm4 has no effects on the yeast form of the fungus. However, the  
36 absence of Rrm4 causes characteristic defects in unipolar growth when switching to the  
37 hyphal form: the rate of bipolarly growing hyphae increases and the insertion of basal septa is  
38 delayed (Baumann et al., 2014, Becht, Vollmeister et al., 2005). In line with endosomal  
39 mRNA transport, Rrm4 binds mRNAs and shuttles on early endosomes along microtubules *in*  
40 *vivo* (Baumann et al., 2012, Becht, König et al., 2006). Using the poly(A)-binding protein

41 Pab1 as an mRNA marker revealed that loss of Rrm4 abolishes this transport, resulting in a  
42 gradient of mRNAs declining from the nucleus towards the cell periphery (König, Baumann  
43 *et al.*, 2009). Thus, one function of Rrm4 might be the general distribution of mRNAs within  
44 hyphae (König *et al.*, 2009).

45 Initial CLIP experiments with Rrm4 identified target mRNAs encoding chitinase Cts1  
46 and septin Cdc3, among others (Koepke, Kaffarnik *et al.*, 2011, König *et al.*, 2009). The  
47 subcellular localisation of both proteins was Rrm4-dependent: Loss of Rrm4 strongly reduced  
48 the secretion of the chitinase Cts1. Moreover, shuttling of the Cdc3 protein on early  
49 endosomes was abolished, and the gradient of septin filaments at the growth pole of hyphae  
50 was no longer formed (Baumann *et al.*, 2014). Since *cdc3* mRNA and its encoded protein are  
51 found together with ribosomes on the same shuttling endosomes, we hypothesised that  
52 endosome-coupled translation of *cdc3* mRNA during long-distance transport is critical for the  
53 efficient formation of septin filaments at the growth pole (Baumann *et al.*, 2014). This was  
54 supported by demonstrating that all four septin-encoding mRNAs are present on endosomes  
55 and that septin proteins assemble into heteromeric complexes on the cytoplasmic face of  
56 endosomes during long-distance transport (Zander, Baumann *et al.*, 2016). Thus, Rrm4-  
57 dependent mRNA transport regulates the specific localisation of the corresponding translation  
58 products. To understand this complex process at the transcriptome-wide level, we present  
59 herein an *in vivo* snapshot of RNA binding sites of endosomal RBPs on cargo mRNAs at  
60 single-nucleotide resolution.

61

## 62 **Results**

### 63 **Loss of the glycine/glutamine-rich protein Grp1 affects hyphal growth**

64 In order to identify additional protein components involved in endosomal mRNA transport,  
65 we performed pilot affinity tag purification using Rrm4 as bait. We identified the potential

66 RBP glycine-rich protein 1 (Grp1; UMAG\_02412), which carries an N-terminal RNA  
67 recognition motif (RRM) domain followed by a short C-terminal region rich in glycine and  
68 glutamine (GQ-rich; Fig. 1A, Fig. S1B). The protein was similar to other small RRM proteins,  
69 such as human CIRBP or RBM3 and plant RBG7 (*AtGRP7*), all previously described as  
70 global stress regulators (Fig. 1A; Kang, Park et al., 2013, Zhu, Buhrer et al., 2016).

71 For functional analysis, we generated deletion mutants in laboratory strain AB33. In this  
72 strain the master transcription factor controlling hyphal growth is under control of an  
73 inducible promoter. Thus, hyphal growth can be elicited synchronously by changing the  
74 nitrogen source in the medium. The corresponding hyphae grow like wild type by tip  
75 expansion at the apical pole, while the nucleus is positioned in the centre and septa are  
76 inserted in regular intervals at the basal pole (Fig. S1A; Brachmann, Weinzierl et al., 2001). In  
77 the yeast form of AB33, we observed that loss of Grp1 resulted in slower proliferation as well  
78 as increased cell size (Fig. S1C-E). At lower temperatures, growth of the *grp1Δ* strain was  
79 affected even more strongly and it exhibited an altered colony morphology (Fig. S1F). This  
80 was consistent with a potential function in cold stress response, similar to the plant and human  
81 orthologues (Kang et al., 2013, Zhu et al., 2016). Furthermore, colony growth of the *grp1Δ*  
82 strain was strongly reduced upon treatment with inhibitors of cell wall biosynthesis, such as  
83 Calcofluor White (CFW) or Congo Red (CR; Imai, Noda et al., 2005, Ram & Klis, 2006).  
84 Hence, loss of Grp1 might cause defects in cell wall formation (Fig. S1G).

85 Studying hyphal growth revealed that, unlike observed in *rrm4Δ* strains, loss of Grp1 did  
86 not cause an increased amount of bipolar cells as it is characteristic for defects in microtubule-  
87 dependent transport (see *rrm4Δ* hyphae for comparison; Fig. 1B-C; Haag et al., 2017). On the  
88 contrary, under optimal growth conditions hyphae were significantly longer (Fig. 1B-C), and  
89 the length of empty sections at the basal pole was increased (Fig. 1D; Fig. S1H). Hence, the  
90 coordination of hyphal growth may be disturbed in the absence of Grp1. In order to further

91 support this, we stressed hyphae three hours post induction (h.p.i.) of hyphal growth with the  
92 cell wall inhibitor CFW. In comparison to wild type hyphae, we observed a strongly increased  
93 number of *grp1Δ* hyphae with abnormal shapes (86%), indicating that cell wall integrity  
94 might be affected (Fig. 1E-F).

95 In summary, loss of Grp1 affects both yeast-like and hyphal growth. During the latter,  
96 Grp1 seems to be crucial for the correct coordination of cell wall expansion, which becomes  
97 particularly apparent during stress conditions.

### 98 **Grp1 is a novel component of endosomal mRNA transport**

99 To analyse the subcellular localisation of Grp1, we generated AB33 strains expressing Grp1  
100 fused at its C-terminus to Gfp by homologous recombination. The functional Grp1-Gfp  
101 version accumulated in the cytoplasm as well as in the nucleus of hyphae. In comparison, the  
102 poly(A)-binding protein Pab1-Gfp was absent from the nucleus, suggesting that this  
103 localisation pattern is specific for Grp1 (Fig. 2A). Importantly, a subpopulation of Grp1-Gfp  
104 moved bi-directionally in the cytoplasm with a velocity comparable to Rrm4-Gfp and Pab1-  
105 Gfp, which are known to shuttle on early endosomes (Fig. 2A-B; Supplemental Video 1).

106 To verify that Grp1 shuttles on Rrm4-positive endosomes, we performed dynamic co-  
107 localisation studies using dual-view technology (Baumann, Takeshita *et al.*, 2015). We  
108 generated AB33 strains co-expressing Grp1-Gfp and Rrm4 fused C-terminally to the red  
109 fluorescent protein Tag-Rfp (tRfp; Merzlyak, Goedhart *et al.*, 2007). For comparison, we used  
110 a strain expressing Pab1 fused to the red fluorescent protein mCherry (Campbell, Tour *et al.*,  
111 2002, König *et al.*, 2009). Analysing hyphae 6 h.p.i. 99% of processive Grp1-Gfp signals co-  
112 migrated with Rrm4-tRfp, revealing extensive co-localisation of both proteins in shuttling  
113 units (Fig. 2C-D; Supplemental Video 2). Consistently, 97% of processive Grp1-Gfp signals  
114 co-migrated with Pab1-mCherry, indicating that Grp1, like Pab1, was present on almost all  
115 Rrm4-positive endosomes (Fig. 2C-D; Supplemental Videos 3-4). Thus, Grp1 appears to be a

116 novel component of endosomal mRNPs that might already be recruited to transport mRNPs in  
117 the nucleus.

### 118 **The endosomal localisation of Grp1 depends on Rrm4**

119 To investigate whether Grp1 has an influence on the shuttling of Rrm4-positive endosomes,  
120 we studied Rrm4 movement in *grp1Δ* strains. Loss of Grp1 altered neither processive Rrm4-  
121 Gfp movement nor the velocity of the respective endosomes (Fig. 2E-F; Supplemental Video  
122 5). Vice versa, studying Grp1-Gfp movement in the absence of Rrm4 revealed that its  
123 endosomal localisation depended on Rrm4 (Fig. 2G). Importantly, similar to Pab1-Gfp, a  
124 gradient of Grp1-Gfp was formed in *rrm4Δ* hyphae, with a decreasing signal intensity towards  
125 the growing apex (Fig. 2H-I; König et al., 2009). Similar to Pab1, which is expected to  
126 associate with almost all poly(A) tails of mRNAs (Hogan, Riordan et al., 2008), Grp1 might  
127 therefore be distributed in association with many mRNAs (see below).

128 To test whether Grp1-Gfp binds to endosomes in an mRNA-dependent manner, we  
129 generated AB33 strains expressing Rrm4<sup>mR123</sup>-tRfp. This Rrm4 variant carried point  
130 mutations in the RNP1 regions of RRM domains 1-3 causing a reduced RNA binding activity  
131 and loss of function of Rrm4 (Becht et al., 2006). In dual-view experiments we observed that  
132 Grp1-Gfp like Pab1-Gfp no longer shuttled in the presence of Rrm4<sup>mR123</sup>-tRfp (Fig. 2J). Thus,  
133 the localisation of Grp1 depends on the presence of functional Rrm4, more precisely on its  
134 capability to bind RNA. In summary, we identified Grp1 as a novel component of endosomal  
135 mRNPs whose shuttling on Rrm4-positive endosomes depended on Rrm4 and mRNA.

### 136 **Rrm4 and Grp1 share thousands of target transcripts**

137 In order to learn more about the function of the two endosomal mRNP components Rrm4 and  
138 Grp1 during hyphal growth, we performed a comparative transcriptome-wide analysis of their  
139 RNA binding behaviour using individual-nucleotide resolution UV crosslinking and

140 immunoprecipitation (iCLIP; König, Zarnack et al., 2010). For application with fungal RBPs,  
141 we had to modify a number of steps in the iCLIP protocol (Huppertz, Attig et al., 2014; Fig.  
142 S2; see Materials and methods). One major challenge was the high RNase and protease  
143 activity in fungal cell extracts that resulted in a low yield of crosslinked protein-RNA  
144 complexes and short mRNA fragments. The most critical changes to the protocol came with  
145 the fast processing of crosslinked material and the identification of the optimal UV-C  
146 irradiation dose (Fig. S2).

147 Using the improved protocol, we found that Rrm4-Gfp and Grp1-Gfp displayed  
148 substantial crosslinking to RNA *in vivo* (compared to Gfp control; Fig. 3A). As expected, the  
149 RNA signal was dependent on UV-C irradiation and sensitive to RNase I digestion. Upon  
150 iCLIP library preparation, we obtained more than 100 million sequencing reads,  
151 corresponding to  $4.7 \times 10^6$  and  $14.8 \times 10^6$  crosslink events for Rrm4 and Grp1, respectively  
152 (Fig. S3A-B). Reproducibility between two replicate experiments was high for both proteins,  
153 demonstrating the quality of the obtained data set (Pearson correlation coefficient  $> 0.96$ ,  $p$   
154 value  $< 2.22e-16$ ; Fig. S3C).

155 Consistent with the abundance of both proteins, the crosslink events accumulated into  
156 thousands of clusters that spread across major parts of the transcriptome (Fig. S3A). In order  
157 to focus on the most prominent sites, we used the crosslink frequency within each cluster  
158 relative to the background signal within the same transcript to determine the 25% most  
159 prominent binding sites for Rrm4 and Grp1 ('signal-over-background'; see Materials and  
160 methods). This procedure identified a total of 6,412 binding sites for Rrm4 and 6,478 binding  
161 sites for Grp1, residing in 3,262 and 3,165 target transcripts, respectively (Fig. 3B). This  
162 represented a substantial fraction of the about 6,700 protein-encoding genes in the *U. maydis*  
163 genome (Kämper, Kahmann et al., 2006). Extensive endosomal transport of mRNA is  
164 consistent with a role in evenly distributing mRNAs throughout hyphae (see Discussion).



165 Comparing Rrm4 and Grp1 revealed a large overlap of 2,114 target transcripts that were  
166 conjointly bound by both proteins (Fig. 3B-C, Supplemental Table S1; see below). In this  
167 shared target set, we observed an enrichment for functional categories like mitochondrion,  
168 vesicle transport and cytoskeleton (Fig. 3D). Moreover, we found several known Rrm4 target  
169 transcripts, including for instance all four *septin* mRNAs (Fig. 3C, 3E). Binding sites of Rrm4  
170 and Grp1 in the *septin* mRNAs were almost exclusively located in the 3' untranslated region  
171 (UTR), consistent with the hypothesis that these mRNAs are transported in a translationally  
172 active state (Zander et al., 2016; see Discussion). *cts1* mRNA, another known target of the  
173 Rrm4 transport machinery (Koepke et al., 2011), also carried binding sites of both RBPs in  
174 the 3' UTR (Fig. S3D).

175 To assess the function of target mRNAs that are specifically recognised by only one of  
176 the two RBPs, we applied more stringent criteria to define 280 and 520 transcripts that were  
177 uniquely bound by Rrm4 and Grp1, respectively (Fig. S3E, Supplemental Tables S2-S3).  
178 While the Rrm4-unique set displayed no clear trend, the Grp1-unique set showed an  
179 enrichment for mRNAs encoding nuclear proteins that were involved in transcriptional  
180 regulation and chromatin remodelling (Fig. 3D). Although these mRNAs were expressed and  
181 bound by Grp1, they were most likely not transported by the Rrm4 machinery and would  
182 hence remain around the nucleus. This could facilitate their perinuclear translation and an  
183 efficient nuclear import of the translation products, as being described in mammalian cells for  
184 transcription factors like c-Myc or for metallothionin (Chabanon, Mickleburgh et al., 2005,  
185 Levadoux, Mahon et al., 1999).

186 In summary, the comparative iCLIP approach revealed that Grp1 and Rrm4 conjointly  
187 bind thousands of shared target mRNAs. These offer a comprehensive view on the full  
188 spectrum of cargo mRNAs transported by the endosomal mRNP transport machinery in *U.*  
189 *maydis*.

190 **Rrm4 binds to functionally important sites of target transcripts**

191 Studying the distribution of binding sites in different transcript regions revealed that Rrm4  
192 and Grp1 preferentially bound in the 3' UTR (Fig. 4A). Within this region, both proteins  
193 frequently bound in close proximity, with 51% of Rrm4 binding sites directly overlapping  
194 with a Grp1 binding site (compared to only 5% in the open reading frame, ORF; Fig. 4B-C).  
195 Thus, the cargo mRNAs of the transport mRNPs are often conjointly recognised by both  
196 RBPs in the 3' UTR.

197 In contrast to Grp1 that was almost exclusively attached to the 3' UTR, Rrm4 bound a  
198 substantial fraction of target mRNAs within the ORF (1,315 cases; Fig. 4A, 4C). Taking a  
199 closer look at the binding pattern of Rrm4 along ORFs, we observed an increased binding at  
200 the start and stop codons of selected target mRNAs (Fig. 4D). Whereas only two transcripts  
201 harboured a Grp1 binding site at the start codon, Rrm4 binding sites overlapped the start  
202 codon in 47 cases, like in the transcript encoding the translation initiation factor Sui1 (UMAG  
203 \_02665; Fig. 4E; Supplemental Table S4). Binding of Rrm4 at the start codon of these  
204 mRNAs might interfere with translation initiation, suggesting that these mRNAs may be  
205 transported in a translationally silent state. Of note, the *rrm4* mRNA itself exhibited Rrm4  
206 binding sites around the start codon, hinting at a potential autoregulation (Fig. S3D).

207 Even more prominently than at start codons, we observed a strong accumulation of Rrm4  
208 binding sites at the stop codons of multiple target transcripts (291 cases; Fig. 4D-E;  
209 Supplemental Table S5). These included, for example, both subunits of cytoplasmic dynein  
210 (Dyn1 and Dyn2; Straube, Enard et al., 2001). Furthermore, the stop codon-bound targets  
211 were significantly enriched for mRNAs encoding mitochondrial proteins, including for  
212 instance the majority of nucleus-encoded subunits and accessory components of the F<sub>0</sub>F<sub>1</sub>-  
213 ATPase (Fig. S4). Through binding at the stop codon, Rrm4 might influence translation  
214 termination for distinct targets.

215 In essence, the high-resolution mapping of binding sites for the two endosomal RBPs  
216 Rrm4 and Grp1 revealed (i) that both proteins conjointly bind in the 3' UTR, and (ii) that  
217 Rrm4 additionally recognises binding sites in the ORF and at translational landmarks like  
218 start and stop codons.

### 219 **Rrm4 specifically recognises the motif UAUG via its third RRM**

220 In order to address the RNA sequence specificity of both RBPs, we used the motif analysis  
221 algorithm DREME (Bailey, 2011) to search for sequence motifs in a 30-nt window around the  
222 RBP binding sites. This analysis retrieved UAUG as the most significantly enriched sequence  
223 motif at Rrm4 binding sites (Fig. 5A). Analysing the relative positioning of the motif showed  
224 that more than one third of all Rrm4 binding sites harboured a UAUG motif precisely at the  
225 centre of the binding site (2,201 out of 6,412; Fig. 5B). The motif did not accumulate at Grp1  
226 binding sites, supporting the notion that the motif was specifically recognised by Rrm4.  
227 Notably, the Rrm4 binding sites with UAUG showed stronger relative binding than those  
228 lacking the motif (Fig. 5C), suggesting a tight interaction of Rrm4 with the UAUG-associated  
229 binding sites.

230 A similar sequence analysis of the Grp1 binding sites initially suggested the sequence  
231 UGUA as a potential recognition motif (Fig. S5A). However, the same motif also frequently  
232 occurred at Rrm4 binding sites and showed no clear positioning relative to the Grp1 binding  
233 sites (Fig. S5B), making it questionable whether it was directly involved in the RNA  
234 recognition of Grp1. We therefore did not pursue this motif further.

235 In order to independently verify that Rrm4 specifically recognises the sequence motif  
236 UAUG, we applied the yeast three-hybrid assay (Fig. 5D). We previously used this approach  
237 to successfully identify SELEX-derived RNA aptamers that were recognised by the third  
238 RRM domain of Rrm4 *in vivo* (RRM3; König, Julius *et al.*, 2007). Intriguingly, two RNA  
239 aptamers, SELEX-A1 and SELEX-B1, contained the UAUG motif. We chose SELEX-A1

240 (Fig. 5E; König et al., 2007) to mutate the UAUG motif and tested RNA binding using the  
241 yeast three-hybrid assay. In contrast to the initial SELEX-A1 aptamer, the mutant version was  
242 no longer recognised by Rrm4 (Fig. 5F; Fig. S5C). Consistent with earlier results, mutating  
243 the third RRM domain of Rrm4 gave similar results in the context of the initial SELEX-A1  
244 aptamer (König et al., 2007). Thus, our computational and experimental analyses indicate that  
245 Rrm4 specifically recognises the sequence motif UAUG via its third RRM domain.

246 Interestingly, Rrm4 binding sites in the whole ORF region showed a strong enrichment  
247 for the Rrm4 motif UAUG (Fig. 5H), such that 61% of all ORF binding sites harboured  
248 UAUG. In line with this, the vast majority of start codon-associated binding sites had the start  
249 codon AUG into an UAUG motif (88%, Fig. 5H), whereas stop codons seem to be recognised  
250 differently (UGA overlaps with UAUG i.e. UAUGA; but UAA was the most common stop  
251 codon, 55%, Fig. 5I). Since UAUG-containing binding sites showed particularly strong Rrm4  
252 binding (Fig. 3C; as examples, see *cdc3* and *cdc12* in Fig. 3C, 3E), Rrm4 appears to exhibit a  
253 tight association with the ORF via its third RRM domain. Uniting these observations, we  
254 hypothesised that Rrm4 simultaneously recognised multiple regions of the same cargo  
255 mRNAs. In line with this notion, we found that transcripts with a Rrm4 binding site in the 3'  
256 UTR were significantly enriched for a second Rrm4 binding site in the ORF (663 out of 1,703  
257 transcripts with at least two Rrm4 binding sites; p value < 2.22e-16, Fisher's exact test). In  
258 69% of these cases, the ORF binding site harboured UAUG, and in 56%, the 3' UTR binding  
259 site of Rrm4 overlapped with a Grp1 binding site. Taken together, these observations would  
260 be consistent with a model that Rrm4 binds with its RRM domains RRM1 and/or RRM2 close  
261 to Grp1 in the 3' UTR and via its third RRM domain to a UAUG-containing binding site in  
262 the ORF (Fig. 6).

263

264 **Discussion**

265 At present, a small number of high-throughput studies provided a global view on transported  
266 and localised mRNAs. In oocytes and embryos from fruit fly, transcriptome-wide RNA *in situ*  
267 hybridisation approaches revealed that the majority of transcripts exhibit a defined  
268 localisation pattern (Jambor, Surendranath *et al.*, 2015, Lécuyer, Yoshida *et al.*, 2007). In  
269 neuronal cells, the localised transcriptome and proteome have also been compiled (Cajigas,  
270 Tushev *et al.*, 2012, Rangaraju, Tom Dieck *et al.*, 2017). However, it is still unclear (i) how  
271 these cargo mRNAs reach their destination, (ii) which RBPs mediate their transport, and (iii)  
272 what are the precise interaction sites within the target mRNAs. Here, we applied iCLIP to  
273 study the newly identified endosomal RBP Grp1 and the key transport RBP Rrm4 during  
274 endosomal mRNP transport in *U. maydis*. According to the best of our knowledge, this is the  
275 first detailed iCLIP analysis of mRNA transport.

276 **The GQ-rich RNA-binding protein Grp1 is a novel component of endosomal mRNPs**

277 The small GQ-rich protein Grp1 shares similarity with other glycine-rich RBPs from humans  
278 and plants. A characteristic feature of this conserved class of RBPs is an N-terminal RRM  
279 domain followed by a glycine-rich low-complexity sequence that is typical for intrinsically  
280 disordered regions (IDRs). In RBPs, IDRs mediate the assembly of membrane-less organelles  
281 through phase transitions (Calabretta & Richard, 2015), and this assembly is important, for  
282 example, during splicing (Ying, Wang *et al.*, 2017). Interestingly, IDRs have also been  
283 implicated in the formation of RNA granules for neuronal RNA transport (Jung, Yoon *et al.*,  
284 2012, Kato, Han *et al.*, 2012).

285 Small glycine-rich RBPs function in a wide variety of biological processes. The plant  
286 protein *AtGRP7*, for example, is involved in cold stress adaption, osmotic stress response,  
287 circadian rhythm and plant immunity (Ciuzan, Hancock *et al.*, 2015, Kang *et al.*, 2013, Meyer,  
288 Koster *et al.*, 2017). Human CIRBP regulates telomerase activity, and the human cold shock

289 protein RBM3 is involved in translational reprogramming during the cooling response of  
290 neuronal cells (Bastide, Peretti *et al.*, 2017, Peretti, Bastide *et al.*, 2015, Zhu *et al.*, 2016).  
291 Globally, these proteins might function as RNA chaperones that prevent the formation of  
292 aberrant RNA secondary structures under stress conditions (Ciuzan *et al.*, 2015, Kim, Park *et*  
293 *al.*, 2007).

294 In this study, we observe that loss of the fungal orthologue Grp1 causes aberrant  
295 alterations of the hyphal growth programme. Under optimal conditions *grp1Δ* hyphae grow  
296 significantly longer, suggesting an unusual acceleration of cell wall formation. Moreover, cell  
297 wall stress revealed clear abnormal morphologies in comparison to wild type. Consistent with  
298 a role in hyphal growth, Grp1 shuttles on Rrm4-positive endosomes that are the main  
299 transport units for long-distance transport of mRNAs in hyphae. Moreover, Grp1 and Rrm4  
300 conjointly bind in the 3' UTRs of thousands of target mRNAs (Fig. 6A, see below). We  
301 therefore conclude that the potential RNA chaperone Grp1 is involved in efficient transport of  
302 mRNPs, in particular under suboptimal conditions.

303 It is of note that the RRM protein Hrb27C (Hrp48) from fruit fly with a related domain  
304 architecture containing two N-terminal RRMs followed by a C-terminal GQ-rich region was  
305 found as an mRNP component during transport of *oskar* and *gurken* mRNAs (Goodrich,  
306 Clouse *et al.*, 2004, Huynh, Munro *et al.*, 2004, Yano, Lopez de Quinto *et al.*, 2004). Hence,  
307 the presence of small glycine-rich RBPs in transport mRNPs might be preserved across  
308 organisms.

### 309 **Endosomal RBPs recognise a broad spectrum of cargo mRNAs**

310 In order to obtain a comprehensive view on the *in vivo* mRNA targets of an RBP, UV  
311 crosslinking techniques are currently the method of choice (König, Zarnack *et al.*, 2012, Van  
312 Nostrand, Pratt *et al.*, 2016, Zarnegar, Flynn *et al.*, 2016). Here, we applied iCLIP to study  
313 fungal mRNA transport. A strength of our approach was the use of strains expressing

314 functional Gfp-tagged versions of Grp1 and Rrm4 using homologous recombination to avoid  
315 overexpression artefacts. For application in fungi, we had to improve several steps (Huppertz  
316 et al., 2014), of which optimising the dose and duration of UV-C irradiation was most critical.  
317 Thereby, we were able to obtain a transcriptome-wide view of the cargo mRNAs, including  
318 their interaction sites with cognate RBPs at single nucleotide resolution.

319 Comparing two distinct RBPs present in endosomal mRNPs enabled us to disentangle  
320 the precise binding behaviour of the two co-localising RBPs. We identified more than 2,000  
321 shared target transcripts, covering a substantial amount of the approximately 6,700 annotated  
322 protein-coding genes (Kämper et al., 2006; <http://pedant.helmholtz-muenchen.de/index.jsp>;  
323 ORF update 2016.11.08). The broad target spectrum of endosomal mRNA transport fits with  
324 earlier observations that Rrm4 transported all mRNAs under investigation, albeit with  
325 different processivity of transport (König et al., 2009). Moreover, loss of Rrm4 impairs the  
326 global mRNA distribution in hyphae, indicated by a disturbed subcellular distribution of the  
327 poly(A)-binding protein Pab1 (König et al., 2009). Thus, one function of the endosomal  
328 mRNA transport machinery might be the equal distribution of mRNPs to supply all parts of  
329 the hyphae with mRNAs. This might be particularly important for those parts that are distant  
330 from the mRNA-synthesising nucleus. Such a universal mRNA transport mode resembles the  
331 “sushi belt model” in neuronal cells, in which the shuttling of mRNPs by active transport  
332 along microtubules is thought to distribute mRNAs throughout the dendrite to serve synapses  
333 that are in demand of mRNAs (Doyle & Kiebler, 2011). Furthermore, since many mRNAs in  
334 *U. maydis* appear to be transported in a translationally active state (see below), this mRNA  
335 distributor function would also disclose the mechanism of how ribosomes are transported by  
336 endosomes, as observed previously (Higuchi, Ashwin et al., 2014).

337 Notably, we found that most nuclear-encoded subunits and accessory components of  
338 mitochondrial FoF<sub>1</sub> ATPase are targets of endosomal mRNP transport in *U. maydis*.  
339 Consistent with the idea that a precise spatiotemporal regulation of translation might be

340 important for efficient mitochondrial protein import, we observed that the abundance of Atp4  
341 is reduced in *rrm4Δ* hyphae (Koepke et al., 2011). These results agree with previous findings  
342 that the 3' UTR of *ATP2* mRNA from *S. cerevisiae* is important for efficient mitochondrial  
343 uptake of mature Atp2p (Margeot, Blugeon et al., 2002). A close link between RNA biology  
344 and mitochondrial protein import is thus an emerging theme in mitochondrial biology  
345 (Gehrke, Wu et al., 2015, Gold, Chroscicki et al., 2017, Lesnik, Golani-Armon et al., 2015,  
346 Sen & Cox, 2016, Zhang, Chen et al., 2016).

### 347 **Distinct binding patterns of Rrm4 may allow orchestration of mRNA transport and** 348 **translation**

349 The positional information obtained by single nucleotide resolution was essential to uncover  
350 the precise binding behaviour of the involved RBPs. In the majority of cases, Rrm4 binds  
351 together with Grp1 in the 3' UTR (1,700 transcripts; Fig. 6A). The vicinity of these binding  
352 sites to the poly(A) tail fits the previous observation that the endosomal adaptor protein Upa1  
353 interacts with both Rrm4 and Pab1 (Pohlmann, Baumann et al., 2015). While translating  
354 ribosomes would potentially remove RBPs from the ORF (Halstead, Lionnet et al., 2015),  
355 such binding in the 3' UTR, as seen e.g. on all four *septin* mRNAs, would allow simultaneous  
356 translation and transport of mRNAs. Consistently, we have recently provided evidence that  
357 endosome-coupled translation of *septin* mRNAs mediates endosomal assembly and transport  
358 of heteromeric septin complexes (Baumann et al., 2014, Zander et al., 2016). Since transport  
359 of translationally active mRNAs has recently been observed in neurons (Wu, Eliscovich et al.,  
360 2016), this mode of transport might be more widespread than currently anticipated.

361 Our transcriptome-wide RNA binding maps illustrate an intriguing binding pattern of  
362 Rrm4 at translational landmark sites, indicating an intimate connection of endosomal mRNP  
363 transport and translation in *U. maydis* (Fig. 6A): First, in over 1,000 target transcripts Rrm4  
364 binds within the ORF, indicating that it may be involved in stalling translational elongation.



365 Notably, a similar mechanism was suggested in neurons, in which a subset of mRNAs are  
366 translationally stalled during transport (Graber, Hebert-Seropian et al., 2013). Similar to  
367 Rrm4, the neuronal RBP FMR1 binds its translationally stalled target mRNAs preferably in  
368 the coding sequence (Darnell, Van Driesche et al., 2011). Second, in about 50 and 300 cases,  
369 respectively, Rrm4 precisely binds at the start and stop codons of the target transcripts,  
370 suggesting modulation of translation initiation and termination. At start codons and within the  
371 ORF, the Rrm4 binding sites frequently harboured UAUG. This motif is recognised by the  
372 third RRM domain of Rrm4, mutations of which previously led to strongly reduced overall  
373 RNA binding of Rrm4 (Becht et al., 2006). In accordance with its ELAV-type domain  
374 organisation, we therefore propose that Rrm4 binds UAUG-containing binding sites via its  
375 third RRM to influence translation (Fig. 6B), while the two tandem RRMs (RRM1/2) bind the  
376 target mRNAs in the 3' UTR, possibly together with Grp1 (Fig. 6B). Since Rrm4 variants  
377 with mutations in RRM3 did not show a phenotype with respect to hyphal growth (Becht et  
378 al., 2006), the translational regulation during endosomal mRNP transport may be an additive  
379 and used for fine tuning, but not essential. In contrast, RRM1 was crucial for hyphal growth,  
380 and mutations in this domain resulted in reduced endosomal shuttling of Pab1 as well as *cdc3*  
381 mRNA (Baumann et al., 2014). These observations are in line with the notion that the tandem  
382 RRMs of Rrm4 might mediate the recognition of target mRNAs for transport, possibly via  
383 binding in the 3' UTR.

384 In essence, our comprehensive transcriptome-wide view on endosomal mRNA transport  
385 revealed the precise positional deposition of co-localising RBPs during transport. The key  
386 RBP Rrm4 exhibits a particular binding behaviour by recognising distinct landmarks of  
387 translation in target mRNAs. Thereby, translation and transport might be intimately coupled  
388 and precisely synchronised for the specific expression needs of each target transcript.

## 389 **Materials and methods**

### 390 **Plasmids, strains and growth conditions**

391 Cloning was done using *E. coli* K-12 derivative Top10 (Life Technologies, Carlsbad, CA,  
392 USA). All strains were constructed by the transformation of cells with linearised plasmids,  
393 and homologous integration events were verified by Southern blot analysis (Brachmann,  
394 König et al., 2004). Genomic DNA of wild type strain UM521 (*alb1*) served as template for  
395 PCR amplifications unless noted otherwise. Proteins were tagged with eGfp (enhanced green  
396 fluorescent protein; Clontech, Mountain View, CA, USA), Tag-Rfp or mCherry (Merzlyak et  
397 al., 2007, Shaner, Campbell et al., 2004). Plasmid sequences are available upon request. The  
398 accession numbers of *U. maydis* genes used in this study are: *rrm4* (UMAG\_10836), *grp1*  
399 (UMAG\_02412), *pab1* (UMAG\_03494). Detailed information is supplied in Supplemental  
400 Tables S8-S9. The conditions used for cultivation of *U. maydis* are described elsewhere  
401 (Brachmann et al., 2004). For the induction of filamentous growth of lab strain AB33 and  
402 derivatives, cultures were grown to an OD<sub>600</sub> of 0.5 in complete medium supplemented with 1%  
403 glucose (CM-glc) and shifted to nitrate minimal medium supplemented with 1% glc (NM-  
404 glc). The growth curves of *U. maydis* strains were recorded by cultivating strains in CM-glc at  
405 28°C and measuring the OD<sub>600</sub> every 2 h.

### 406 **Multiple sequence alignments**

407 Orthologous proteins were identified using BLAST P (<https://blast.ncbi.nlm.nih.gov/blast/>).  
408 Clustal W and GeneDoc 2.6 were used for multiple amino acid sequence alignment and  
409 graphical representation, respectively (Larkin, Blackshields et al., 2007).

### 410 **Colony morphology, temperature stress and cell wall stress**

411 For growth on solid media, cell suspensions (OD<sub>600</sub> of 0.5) were inoculated onto respective  
412 plates at 28°C. Colony morphology was tested on CM (1% glc) medium. Temperature stress

413 was analysed on CM (1% glc) medium, incubated at 28°C, 20°C or 16°C. Cell-wall stress was  
414 analysed by supplementing CM (1% glc) medium with 50 µM Calcofluor White (Sigma-  
415 Aldrich, Taufkirchen, Germany) or 40 µg/ml Congo Red (Sigma-Aldrich). All plates were  
416 kept for at least 48 h at the required temperature. The set-up used to acquire images was  
417 described before (Pohlmann *et al.*, 2015). To analyse cell wall stress in hyphae, 2.5 µM  
418 Calcofluor White was added to cultures 3 hours post induction (h.p.i) and incubated for an  
419 additional 2 h.

#### 420 **Microscopy and image processing**

421 The microscope set-ups and dual-colour imaging were used as described before (Baumann *et al.*  
422 *et al.*, 2012, Baumann *et al.*, 2015, Baumann, Zander *et al.*, 2016). Gfp and tagRfp or mCherry  
423 fluorescence was simultaneously detected using a two-channel imager (DV2, Photometrics,  
424 Tucson, AZ, USA). All images and videos were acquired and analysed using Metamorph  
425 (Versions 7.7.0.0 and 7.7.4.0; Molecular Devices, Sunnyvale, CA, USA).

426 Cell length was assessed by measuring the length of single cells from pole-to-pole. For  
427 hyphae, empty sections were not included in the measurements. The length of empty sections  
428 was assessed by measuring the distance from septum to septum of the first empty section at  
429 the distal pole of hyphae. Cell wall defects induced by Calcofluor White were quantified by  
430 manually scoring for the presence of abnormal cell wall shapes.

431 For the analysis of co-localisation and velocity of moving signals the acquired videos  
432 were converted to kymographs using Metamorph. Co-localisation was assessed by  
433 quantifying kymographs acquired by dual-colour imaging. Changes in direction were counted  
434 as individual signals. Processive signals (distance travelled > 5 µm) were counted manually.  
435 Velocity was only measured for processive signals (movement > 5 µm). For all  
436 quantifications, at least three independent experiments were analysed. Statistical analysis was  
437 performed using Prism5 (Graphpad, La Jolla, CA, USA).

438 The gradient of Grp1-Gfp, Pab1-Gfp and Gfp in the presence and absence of Rrm4 was  
439 quantified by measuring the fluorescence intensity in a previously specified region of interest  
440 (ROI; ROI1 in vicinity to the nucleus and ROI2 at the hyphal tip). The fluorescence close to  
441 the nucleus was then set in relation to the signal intensity at the tip. For all quantifications, at  
442 least three independent experiments were analysed. Statistical analysis was performed using  
443 Prism5 (Graphpad, La Jolla, CA, USA).

#### 444 **iCLIP experiments**

445 The iCLIP protocol was modified from the one described in Huppertz *et al.*, 2014. (i) The  
446 initial two-step Tap tag purification (König *et al.*, 2009) was switched to single-step  
447 purification using Rrm4-Gfp-expressing strains and Gfp-trap immunoprecipitation  
448 (Rothbauer, Zolghadr *et al.*, 2008; ChromoTek, Martinsried, Germany). (ii) For UV-C  
449 crosslinking, cells were irradiated continuously in a single session. (iii) RNase I (1/10  
450 dilution, 16 minutes, 37°C) was used for the controls (Fig. 3A). The addition of DNase and  
451 RNase I was omitted from the samples used for iCLIP library preparation. The addition of  
452 external RNases was unnecessary due to the high fungal RNase activity. The experiments  
453 were performed with 150 ml cultures grown to an  $OD_{600} = 0.5$  in CM (1% glc) and then  
454 shifted to NM-glc. After 6 h hyphae were harvested by centrifugation at 7,500 rpm for 10 min  
455 at 4°C and the pellet resuspended in 15 ml ice-cold PBS. For UV-C crosslinking, the cell  
456 suspension was split into 3x 5 ml and kept on ice. Cells were irradiated with 200 mJ/cm<sup>2</sup> at  
457 254 nm (Biolink UV-Crosslinker, Vilber-Lourmat, Eberhardzell, Germany), pooled in a 50 ml  
458 tube, and hyphae were harvested by centrifugation at 7,500 rpm for 10 min at 4°C. Hyphae  
459 were resuspended in 6 ml lysis buffer (50 mM Tris-HCl, pH 7.4, 100 mM NaCl, 1% Nonidet  
460 P-40, 0.1% SDS, 0.5% sodium deoxycholate) supplemented with proteinase inhibitors per 10  
461 ml lysis buffer: 2× Complete protease inhibitor EDTA-free (Roche Diagnostics, Mannheim,  
462 Germany), 1 mM reduced DTT (GERBU, Heidelberg, Germany), 1 mM PMSF (Sigma), 0.75

463  $\mu\text{g}/\mu\text{l}$  heparin (Sigma), 5.25 ng/ $\mu\text{l}$  pepstatin A (Sigma) and 15  $\mu\text{l}$  SUPERase-In (20 U/ $\mu\text{L}$ ;  
464 Thermo Fisher Scientific, Darmstadt, Germany). Cell lysis was performed in a Retsch ball  
465 mill (d=12 mm; MM400; Retsch, Haan, Germany) 3 times for 10 min at 30 Hz while keeping  
466 samples frozen using liquid nitrogen. All following steps were performed at 4°C. The cell  
467 lysate was harvested by centrifugation at 7,500 rpm for 10 min at 4°C, pooled, and the  
468 protein-RNA complexes purified by using 60  $\mu\text{l}$  GFP-Trap\_MA beads (Chromotek;  
469 Rothbauer *et al.*, 2008). The beads were pre-washed 3 times with 500  $\mu\text{l}$  ice-cold lysis buffer  
470 (without inhibitors), the cell lysate added and incubated for 1 h at 4°C. All following washing  
471 steps of the beads were performed with 900  $\mu\text{l}$  of the respective buffer. The beads were  
472 washed 3 times with high-salt wash buffer and 4 times with PNK buffer. 3' end RNA  
473 dephosphorylation, L3 adapter ligation, 5' end phosphorylation, SDS-PAGE and nitrocellulose  
474 transfer were performed as described (Huppertz *et al.*, 2014) with minor changes  
475 implemented. 50% instead of 20% of the sample were radioactively labelled for 10 min at  
476 37°C and the labelled beads were washed once with PNK buffer before they were combined  
477 with the unlabelled beads. The beads were diluted in 80  $\mu\text{l}$  1× NuPAGE LDS loading buffer  
478 (NP0007, Invitrogen, Darmstadt, Germany) with 0.1 M DTT. The protein-RNA complexes  
479 were separated at 180 V for 70 min on a 4-12% NuPAGE Bis-Tris gel (1x MOPS running  
480 buffer, NP0001, Invitrogen) and transferred onto a nitrocellulose membrane. Gfp was detected  
481 using monoclonal  $\alpha$ -GFP antibodies (clones 7.1 and 13.1; Sigma) and a mouse IgG HRP  
482 conjugate (H+L; Promega, Madison, WI, USA) as first and secondary antibody, respectively.  
483 Peroxidase activity was determined using the AceGlow blotting detection system (PepLab,  
484 Erlangen, Germany).

485       Labelled RNA was detected by overnight exposure of X-ray films at -80°C. All  
486 following steps were performed as described before (Huppertz *et al.*, 2014). To avoid over-  
487 amplification of the cDNA library, the optimal PCR cycle number was tested for each  
488 individual protein in every experiment (PCR cycler, PTC-200, MJ Research, St. Bruno,

489 Quebec, Canada). For all Grp1 and Gfp replicates, 18 PCR cycles were determined, and for  
490 the Rrm4 sample, 18 and 22 PCR cycles were determined for the two replicates, producing  
491 PCR products of around 150 nt (cDNA insert = 20-30 nt; L3 adapter, RT-primer and P3/P5  
492 Solexa primers = 128 nt).

493 The iCLIP libraries were multiplexed and sequenced on an Illumina HiSeq 2500 (San  
494 Diego, CA, USA; 51-nt reads, single-end), yielding a total of 118 million reads.

### 495 **iCLIP data processing**

496 All bioinformatics analyses are based on the *U. maydis* 521 genome sequence (original  
497 PEDANT database name p3\_t237631\_Ust\_maydi\_v2GB) and the associated gene annotation  
498 (version p3\_t237631\_Ust\_maydi\_v2GB.gff3; both downloaded from  
499 [ftp://ftpmips.gsf.de/fungi/Ustilaginaceae/Ustilago\\_maydis\\_521/](ftp://ftpmips.gsf.de/fungi/Ustilaginaceae/Ustilago_maydis_521/)). We extended all genes by  
500 300 nt on either side to include potential 5' and 3' UTR regions which are currently not  
501 annotated in the *U. maydis* genome. For manual annotation of transcript ends, RNASeq data  
502 (AB33 hyphae, 6 h.p.i.) were used, and transcript ends were defined at the position where  
503 read coverage dropped below 10.

504 Basic quality checks were applied to all sequenced reads using FastQC  
505 (<https://www.bioinformatics.babraham.ac.uk/projects/fastqc/>). Afterwards, iCLIP reads were  
506 filtered based on sequencing quality (Phred score) in the barcode region, keeping only reads  
507 with at most one position with a Phred score < 20 in the experimental barcode (positions 4 to  
508 7) and without any position with a Phred score < 17 in the random barcode (positions 1 to 3  
509 and 8 to 9). The reads were then de-multiplexed based on the experimental barcode at  
510 positions 4 to 7 using Flexbar (version 2.4, GitHub, San Francisco, CA, USA) without  
511 allowing mismatches (Dodt, Roehr et al., 2012). The following analysis steps were applied to  
512 all individual samples: remaining adapter sequences were trimmed from the 3' end of the  
513 reads using Flexbar (version 2.4) allowing one mismatch in 10 nt, requiring a minimal overlap

514 of 1 nt between read and adapter as well as removing all reads with a remaining length of less  
515 than 24 nt (including the 9-nt barcode). The first 9-nt of each read containing the barcode  
516 were trimmed off and added to the read name in the fastq file.

517 Filtered and trimmed reads were mapped to the *U. maydis* genome and its gene annotation  
518 using STAR (version 2.5.1b, GitHub; Dobin, Davis et al., 2013), allowing up to two  
519 mismatches and without soft-clipping on the 5' end of the reads. Only uniquely mapped reads  
520 were kept for further analysis.

521 After mapping and filtering, duplicate reads were marked using the *dedup* function from  
522 bamUtil (version 1.0.7; <https://github.com/statgen/bamUtil>) and removed if carrying an  
523 identical random barcode, and hence representing technical duplicates. The nucleotide  
524 position upstream of each aligned read was considered as the 'crosslink nucleotide', with each  
525 read counted as individual 'crosslink event'. The total number of crosslink events for the  
526 different iCLIP libraries can be found in Fig. S3A. To assess the reproducibility between  
527 biological replicates (Fig. S3C), we counted the number of crosslink events within each gene.

528 For the identification of putative RBP binding sites, peak calling was performed on  
529 merged replicates for each RBP using ASPeak (Kucukural, Ozadam et al., 2013). The  
530 predicted peaks were centred on the summit (i.e. the first position with highest number of  
531 crosslink events within the peak) and then extended to 9-nt. Overlapping peaks were merged  
532 and newly centred as described above. To account for reproducibility, we required each  
533 binding site to be detected by at least 5 crosslink events from each biological replicate. We  
534 further removed all Rrm4 and Grp1 binding sites that overlapped by at least 1 nt with any of  
535 88 reproducible Gfp binding sites. This yielded a total of 14,120 binding site clusters sites for  
536 Rrm4 and 18,155 binding sites for Grp1 (Fig. S3).

537 In order to facilitate comparisons between binding sites, crosslink events from both  
538 replicates were summed up within each binding site and represented as 'signal-over-  
539 background' (SOB). Background for each gene was the number of crosslink events outside

540 the binding sites divided by the number of nucleotides in the gene that harbour such  
541 background crosslink events. Only binding sites associated with the top 25% of the SOB  
542 distribution for each RBP were taken into consideration for further analyses. This procedure  
543 yielded a total of 6,412 and 6,478 binding sites for Rrm4 and Grp1, respectively (Fig. 3B).  
544 The binding sites corresponded to 3,262 and 3,165 target transcripts for Rrm4 and Grp1,  
545 respectively. To define a high-confidence set of target genes that are exclusively bound by  
546 Rrm4 and show no evidence of Grp1 binding, we subtracted the full set of identified Grp1  
547 binding sites (before SOB filtering), and vice versa. When assigning genomic nucleotides and  
548 RBP binding sites to distinct transcript regions (Fig. 3D), we applied the following hierarchy  
549 to resolve overlapping annotation: 3' UTR > 5' UTR > exon > intron.

550 Enriched sequence motifs around RBP binding sites were identified using DREME  
551 (Bailey, 2011; parameter `-norc` to search the coding strand only) to analyse a 30-nt window  
552 around all binding site summits compared to shuffled nucleotides. Based on the sequence  
553 profile and the UAUG content around binding sites (Fig. 5A-B), we counted a binding site as  
554 UAUG-containing if it harboured the motif with the last 5 nt of the 9-nt binding sites.

555 Analysing functional categories of cellular components on identified targets was  
556 performed using the FunCat annotation scheme (<http://mips.gsf.de/funecatDB/>; version 2.1,  
557 reference genome: `p3_t237631_Ust_maydi_v2GB`; Ruepp, Zollner et al., 2004). Categories  
558 were filtered during analysis for enrichment by setting the p-value threshold to <0.05.

559

## 560 **RNASeq library preparation and data processing**

561 RNA was extracted from AB33 hyphae 6 h.p.i. using the RNeasy Mini kit following the  
562 manufacturer's instructions for preparation of total RNA from yeast (Qiagen, Hilden,  
563 Germany). To this end, AB33 hyphae were opened in a Retsch ball mill (3 balls, d=4 mm ;  
564 MM400; Retsch, Haan, Germany) 4 times for 5 min at 30 Hz while keeping samples frozen



565 using liquid nitrogen. The resulting cell powder was resolved in 450  $\mu$ l RLT buffer (+ $\beta$ -  
566 mercapthoethanol) and centrifuged at 13,000 rpm for 2 min at 4°C. The supernatant was  
567 transferred to a new reaction tube, mixed with 1 volume 70% EtOH and then added to the  
568 RNeasy spin column. All following processing steps were performed according to  
569 manufacturer's instructions. TruSeq RNA Library Prep kit v2 (Illumina, San Diego, CA,  
570 USA) was used for cDNA library generation. The cDNA libraries were sequenced using the  
571 HiSeq 2000 platform (Illumina) with 151-nt single-end reads.

572 Basic quality checks were applied to all sequenced reads using FastQC  
573 (<https://www.bioinformatics.babraham.ac.uk/projects/fastqc/>). Afterwards, RNA-Seq reads  
574 were trimmed based on sequencing quality (Phred score) using Flexbar (version 3.0.3; Dodt et  
575 al., 2012). Specifically, adapter sequences were removed (TruSeq Universal Adapter), and  
576 reads were trimmed at the first position with a Phred score < 20 and removed if the remaining  
577 read length was less than 20 nt. The trimmed reads were mapped to the *U. maydis* genome  
578 and its gene annotation using STAR (version 2.5.3a; Dobin et al., 2013), allowing up to five  
579 mismatches with soft-clipping. Uniquely mapped reads were kept for further analysis.

### 580 **Yeast three-hybrid analysis**

581 Yeast three-hybrid experiments were performed as described previously (König et al., 2007,  
582 Vollmeister, Haag et al., 2009). To test the interaction with Rrm4, the plasmids encoding the  
583 RNA aptamers SELEX-A1(König et al., 2007) or mutated SELEX-A1 (mUAUG; this work)  
584 were cotransformed in strain L40 coat with the corresponding plasmids encoding for Rrm4 or  
585 mutated variants (König et al., 2007, SenGupta, Zhang et al., 1996). Transformed cells were  
586 incubated on SC -ura -leu plates (2-3 d at 28°C) before single clones were selected.  
587 Interaction was assayed as growth on selection medium SC -his +1 mM 3-AT (3-amino-1,2,4-  
588 triazole; Sigma-Aldrich) (3 d at 28°C). For the serial dilution assays, single clones were  
589 grown in SC -ura -leu medium to a starting OD<sub>600</sub> = 0,5 and sequentially diluted 1:5 in water.

590 The dilutions were then spotted on control (SC -ura -leu) and selection (SC -his +1 mM 3-AT)  
591 plates and incubated at 28°C.

592

### 593 **Data accessibility**

594 The iCLIP and RNASeq dataset are available from GEO under the accession numbers

595 GSE109557 and GSE109560, respectively. The associated SuperSeries is GSE109561.

596 The security token for anonymous Reviewer access to SuperSeries GSE109561 is

597 gtabuyaihpatrix.

598

### 599 **Acknowledgements**

600 We thank Drs. J. Koepke and J. Kahnt for pilot Tap tag experiments and Dr T. Pohlmann for

601 initial work on Grp1 fusion proteins. We acknowledge R. F. X. Sutandy for iCLIP support, M.

602 Brüggemann for RNASeq data analysis, F. Finkernagel for bioinformatics and Dr. M. Seiler

603 for critical reading of the manuscript. We are grateful to U. Gengenbacher and S. Esch for

604 excellent technical assistance and members of the IMB Genomics core facility for technical

605 assistance. The work was funded by grants from the Deutsche Forschungsgemeinschaft to MF

606 (FE 448/8-1; FOR2333-TP03 FE-448/10-1; CEPLAS EXC1028) and KZ (FOR2333-TP10

607 ZA 881/1-1) and JK (SPP1935 KO 4566/2-1) and JU (European Research Council; 617837-

608 Translate).

609

### 610 **Competing interests**

611 The authors declare that they have no competing interests.

612

613

614 **References**

- 615 Bailey TL (2011) DREME: motif discovery in transcription factor ChIP-seq data.  
616 *Bioinformatics* 27: 1653-1659
- 617 Bastide A, Peretti D, Knight JR, Grosso S, Spriggs RV, Pichon X, Sbarrato T, Roobol A,  
618 Roobol J, Vito D, Bushell M, von der Haar T, Smales CM, Mallucci GR, Willis AE  
619 (2017) RTN3 is a novel cold-induced protein and mediates neuroprotective effects of  
620 RBM3. *Curr Biol* 27: 638-650
- 621 Baumann S, König J, Koepke J, Feldbrügge M (2014) Endosomal transport of septin mRNA  
622 and protein indicates local translation on endosomes and is required for correct septin  
623 filamentation. *EMBO Rep* 15: 94-102
- 624 Baumann S, Pohlmann T, Jungbluth M, Brachmann A, Feldbrügge M (2012) Kinesin-3 and  
625 dynein mediate microtubule-dependent co-transport of mRNPs and endosomes. *J Cell Sci*  
626 125: 2740-2752
- 627 Baumann S, Takeshita N, Grün N, Fischer R, Feldbrügge M (2015) Live cell imaging of  
628 endosomal trafficking in fungi. In *Methods in Mol Biol: Membrane trafficking*, Tang BL  
629 (ed) pp 347-363. New York: Springer
- 630 Baumann S, Zander S, Weidtkamp-Peters S, Feldbrügge M (2016) Live cell imaging of septin  
631 dynamics in *Ustilago maydis*. In *Septins*, Gladfelter AS (ed) pp 143-149. Elsevier Inc.
- 632 Becht P, König J, Feldbrügge M (2006) The RNA-binding protein Rrm4 is essential for  
633 polarity in *Ustilago maydis* and shuttles along microtubules. *J Cell Sci* 119: 4964-4973
- 634 Becht P, Vollmeister E, Feldbrügge M (2005) Role for RNA-binding proteins implicated in  
635 pathogenic development of *Ustilago maydis*. *Euk Cell* 4: 121-133
- 636 Brachmann A, König J, Julius C, Feldbrügge M (2004) A reverse genetic approach for  
637 generating gene replacement mutants in *Ustilago maydis*. *Mol Gen Genom* 272: 216-226
- 638 Brachmann A, Weinzierl G, Kämper J, Kahmann R (2001) Identification of genes in the  
639 bW/bE regulatory cascade in *Ustilago maydis*. *Mol Microbiol* 42: 1047-1063
- 640 Cajigas IJ, Tushev G, Will TJ, tom Dieck S, Fuerst N, Schuman EM (2012) The local  
641 transcriptome in the synaptic neuropil revealed by deep sequencing and high-resolution  
642 imaging. *Neuron* 74: 453-466
- 643 Calabretta S, Richard S (2015) Emerging roles of disordered sequences in RNA-binding  
644 proteins. *Trends Biochem Sci* 40: 662-672
- 645 Campbell RE, Tour O, Palmer AE, Steinbach PA, Baird GS, Zacharias DA, Tsien RY (2002) A  
646 monomeric red fluorescent protein. *Proc Natl Acad Sci U S A* 99: 7877-7882
- 647 Chabanon H, Mickleburgh I, Burtle B, Pedder C, Hesketh J (2005) An AU-rich stem-loop  
648 structure is a critical feature of the perinuclear localization signal of c-myc mRNA.  
649 *Biochem J* 392: 475-483
- 650 Ciuzan O, Hancock J, Pamfil D, Wilson I, Lodomery M (2015) The evolutionarily conserved  
651 multifunctional glycine-rich RNA-binding proteins play key roles in development and  
652 stress adaptation. *Physiol Plant* 153: 1-11
- 653 Darnell JC, Van Driesche SJ, Zhang C, Hung KY, Mele A, Fraser CE, Stone EF, Chen C, Fak  
654 JJ, Chi SW, Licatalosi DD, Richter JD, Darnell RB (2011) FMRP stalls ribosomal  
655 translocation on mRNAs linked to synaptic function and autism. *Cell* 146: 247-261
- 656 Dobin A, Davis CA, Schlesinger F, Drenkow J, Zaleski C, Jha S, Batut P, Chaisson M,  
657 Gingeras TR (2013) STAR: ultrafast universal RNA-seq aligner. *Bioinformatics* 29: 15-  
658 21
- 659 Dodt M, Roehr JT, Ahmed R, Dieterich C (2012) FLEXBAR-flexible barcode and adapter  
660 processing for next-generation sequencing platforms. *Biology* 1: 895-905
- 661 Doyle M, Kiebler MA (2011) Mechanisms of dendritic mRNA transport and its role in  
662 synaptic tagging. *EMBO J* 30: 3540-3552

- 663 Egan MJ, McClintock MA, Reck-Peterson SL (2012) Microtubule-based transport in  
664 filamentous fungi. *Curr Opin Microbiol* 15: 637-645
- 665 Eliscovich C, Singer RH (2017) RNP transport in cell biology: the long and winding road.  
666 *Current opinion in cell biology* 45: 38-46
- 667 Gehrke S, Wu Z, Klinkenberg M, Sun Y, Auburger G, Guo S, Lu B (2015) PINK1 and Parkin  
668 control localized translation of respiratory chain component mRNAs on mitochondria  
669 outer membrane. *Cell Metab* 21: 95-108
- 670 Gold VA, Chroscicki P, Bragoszewski P, Chacinska A (2017) Visualization of cytosolic  
671 ribosomes on the surface of mitochondria by electron cryo-tomography. *EMBO Rep* 18:  
672 1786-1800
- 673 Goodrich JS, Clouse KN, Schupbach T (2004) Hrb27C, Sqd and Otu cooperatively regulate  
674 *gurken* RNA localization and mediate nurse cell chromosome dispersion in *Drosophila*  
675 oogenesis. *Development* 131: 1949-1958
- 676 Graber TE, Hebert-Seropian S, Khoutorsky A, David A, Yewdell JW, Lacaille JC, Sossin WS  
677 (2013) Reactivation of stalled polyribosomes in synaptic plasticity. *Proc Natl Acad Sci U*  
678 *SA* 110: 16205-16210
- 679 Guimaraes SC, Schuster M, Bielska E, Dagdas G, Kilaru S, Meadows BR, Schrader M,  
680 Steinberg G (2015) Peroxisomes, lipid droplets, and endoplasmic reticulum "hitchhike"  
681 on motile early endosomes. *J Cell Biol* 211: 945-954
- 682 Haag C, Pohlmann T, Feldbrugge M (2017) The ESCRT regulator Did2 maintains the balance  
683 between long-distance endosomal transport and endocytic trafficking. *PLoS Genet* 13:  
684 e1006734
- 685 Haag C, Steuten B, Feldbrügge M (2015) Membrane-coupled mRNA trafficking in fungi.  
686 *Annu Rev Microbiol* 69: 265-281
- 687 Halstead JM, Lionnet T, Wilbertz JH, Wippich F, Ephrussi A, Singer RH, Chao JA (2015)  
688 Translation. An RNA biosensor for imaging the first round of translation from single cells  
689 to living animals. *Science* 347: 1367-1671
- 690 Higuchi Y, Ashwin P, Roger Y, Steinberg G (2014) Early endosome motility spatially  
691 organizes polysome distribution. *J Cell Biol* 204: 343-357
- 692 Hogan DJ, Riordan DP, Gerber AP, Herschlag D, Brown PO (2008) Diverse RNA-binding  
693 proteins interact with functionally related sets of RNAs, suggesting an extensive  
694 regulatory system. *PLoS Biol* 6: e255
- 695 Holt CE, Bullock SL (2009) Subcellular mRNA localization in animal cells and why it  
696 matters. *Science* 326: 1212-1216
- 697 Huppertz I, Attig J, D'Ambrogio A, Easton LE, Sibley CR, Sugimoto Y, Tajnik M, König J,  
698 Ule J (2014) iCLIP: protein-RNA interactions at nucleotide resolution. *Methods* 65: 274-  
699 287
- 700 Huynh JR, Munro TP, Smith-Litiere K, Lepesant JA, St Johnston D (2004) The *Drosophila*  
701 hnRNPA/B homolog, Hrp48, is specifically required for a distinct step in *osk* mRNA  
702 localization. *Dev Cell* 6: 625-635
- 703 Imai K, Noda Y, Adachi H, Yoda K (2005) A novel endoplasmic reticulum membrane protein  
704 Rcr1 regulates chitin deposition in the cell wall of *Saccharomyces cerevisiae*. *J Biol*  
705 *Chem* 280: 8275-84
- 706 Jambor H, Surendranath V, Kalinka AT, Mejstrik P, Saalfeld S, Tomancak P (2015) Systematic  
707 imaging reveals features and changing localization of mRNAs in *Drosophila*  
708 development. *eLife* 4
- 709 Jung H, Yoon BC, Holt CE (2012) Axonal mRNA localization and local protein synthesis in  
710 nervous system assembly, maintenance and repair. *Nat Rev Neurosci* 13: 308-324
- 711 Kämper J, Kahmann R, Bölker M, Ma LJ, Brefort T, Saville BJ, Banuett F, Kronstad JW,  
712 Gold SE, Müller O, Perlin MH, Wösten HA, de Vries R, Ruiz-Herrera J, Reynaga-Pena  
713 CG, Snetselaar K, McCann M, Pérez-Martín J, Feldbrügge M, Basse CW et al. (2006)

- 714 Insights from the genome of the biotrophic fungal plant pathogen *Ustilago maydis*.  
715 *Nature* 444: 97-101
- 716 Kang H, Park SJ, Kwak KJ (2013) Plant RNA chaperones in stress response. *Trends Plant Sci*  
717 18: 100-106
- 718 Kato M, Han TW, Xie S, Shi K, Du X, Wu LC, Mirzaei H, Goldsmith EJ, Longgood J, Pei J,  
719 Grishin NV, Frantz DE, Schneider JW, Chen S, Li L, Sawaya MR, Eisenberg D, Tycko R,  
720 McKnight SL (2012) Cell-free formation of RNA granules: low complexity sequence  
721 domains form dynamic fibers within hydrogels. *Cell* 149: 753-767
- 722 Kim JS, Park SJ, Kwak KJ, Kim YO, Kim JY, Song J, Jang B, Jung CH, Kang H (2007) Cold  
723 shock domain proteins and glycine-rich RNA-binding proteins from *Arabidopsis thaliana*  
724 can promote the cold adaptation process in *Escherichia coli*. *Nucleic Acids Res* 35: 506-  
725 516
- 726 Koepke J, Kaffarnik F, Haag C, Zarnack K, Luscombe NM, König J, Ule J, Kellner R,  
727 Begerow D, Feldbrügge M (2011) The RNA-binding protein Rrm4 is essential for  
728 efficient secretion of endochitinase Cts1. *Mol Cell Proteom* 10: M111.011213 1-15
- 729 König J, Baumann S, Koepke J, Pohlmann T, Zarnack K, Feldbrügge M (2009) The fungal  
730 RNA-binding protein Rrm4 mediates long-distance transport of *ubi1* and *rho3* mRNAs.  
731 *EMBO J* 28: 1855-1866
- 732 König J, Julius C, Baumann S, Homann M, Göringer HU, Feldbrügge M (2007) Combining  
733 SELEX and yeast three-hybrid system for *in vivo* selection and classification of RNA  
734 aptamers. *RNA* 13: 614-622
- 735 König J, Zarnack K, Luscombe NM, Ule J (2012) Protein-RNA interactions: new genomic  
736 technologies and perspectives. *Nat Rev Genet* 13: 77-83
- 737 König J, Zarnack K, Rot G, Curk T, Kayikci M, Zupan B, Turner DJ, Luscombe NM, Ule J  
738 (2010) iCLIP reveals the function of hnRNP particles in splicing at individual nucleotide  
739 resolution. *Nat Struct Mol Biol* 17: 909-915
- 740 Kozak M (2005) Regulation of translation via mRNA structure in prokaryotes and eukaryotes.  
741 *Gene* 361: 13-37
- 742 Kucukural A, Ozadam H, Singh G, Moore MJ, Cenik C (2013) ASPeak: an abundance  
743 sensitive peak detection algorithm for RIP-Seq. *Bioinformatics* 29: 2485-2486
- 744 Larkin MA, Blackshields G, Brown NP, Chenna R, McGettigan PA, McWilliam H, Valentin F,  
745 Wallace IM, Wilm A, Lopez R, Thompson JD, Gibson TJ, Higgins DG (2007) Clustal W  
746 and Clustal X version 2.0. *Bioinformatics* 23: 2947-2948
- 747 Lécuyer E, Yoshida H, Parthasarathy N, Alm C, Babak T, Cerovina T, Hughes TR, Tomancak  
748 P, Krause HM (2007) Global analysis of mRNA localization reveals a prominent role in  
749 organizing cellular architecture and function. *Cell* 131: 174-187
- 750 Lesnik C, Golani-Armon A, Arava Y (2015) Localized translation near the mitochondrial  
751 outer membrane: An update. *RNA Biol* 12: 801-809
- 752 Levadoux M, Mahon C, Beattie JH, Wallace HM, Hesketh JE (1999) Nuclear import of  
753 metallothionein requires its mRNA to be associated with the perinuclear cytoskeleton.  
754 *The Journal of biological chemistry* 274: 34961-34966
- 755 Margeot A, Blugeon C, Sylvestre J, Vialette S, Jacq C, Corral-Debrinski M (2002) In  
756 *Saccharomyces cerevisiae*, *ATP2* mRNA sorting to the vicinity of mitochondria is  
757 essential for respiratory function. *EMBO J* 21: 6893-6904
- 758 Martin KC, Ephrussi A (2009) mRNA localization: gene expression in the spatial dimension.  
759 *Cell* 136: 719-730
- 760 Merzlyak EM, Goedhart J, Shcherbo D, Bulina ME, Shcheglov AS, Fradkov AF, Gaintzeva A,  
761 Lukyanov KA, Lukyanov S, Gadella TW, Chudakov DM (2007) Bright monomeric red  
762 fluorescent protein with an extended fluorescence lifetime. *Nature methods* 4: 555-557

- 763 Meyer K, Koster T, Nolte C, Weinholdt C, Lewinski M, Grosse I, Staiger D (2017) Adaptation  
764 of iCLIP to plants determines the binding landscape of the clock-regulated RNA-binding  
765 protein AtGRP7. *Genome Biol* 18: 204
- 766 Mofatteh M, Bullock SL (2017) SnapShot: Subcellular mRNA localization. *Cell* 169: 178.e1
- 767 Peretti D, Bastide A, Radford H, Verity N, Molloy C, Martin MG, Moreno JA, Steinert JR,  
768 Smith T, Dinsdale D, Willis AE, Mallucci GR (2015) RBM3 mediates structural plasticity  
769 and protective effects of cooling in neurodegeneration. *Nature* 518: 236-239
- 770 Pohlmann T, Baumann S, Haag C, Albrecht M, Feldbrügge M (2015) A FYVE zinc finger  
771 domain protein specifically links mRNA transport to endosome trafficking. *eLife* 4:  
772 10.7554/eLife.06041
- 773 Ram AF, Klis FM (2006) Identification of fungal cell wall mutants using susceptibility assays  
774 based on Calcofluor white and Congo red. *Nat Protoc* 1: 2253-2256
- 775 Rangaraju V, Tom Dieck S, Schuman EM (2017) Local translation in neuronal compartments:  
776 how local is local? *EMBO Rep* 18: 693-711
- 777 Rothbauer U, Zolghadr K, Muyldermans S, Schepers A, Cardoso MC, Leonhardt H (2008) A  
778 versatile nanotrap for biochemical and functional studies with fluorescent fusion proteins.  
779 *Mol Cell Proteomics* 7: 282-289
- 780 Ruepp A, Zollner A, Maier D, Albermann K, Hani J, Mokrejs M, Tetko I, Guldener U,  
781 Mannhaupt G, Münsterkötter M, Mewes HW (2004) The FunCat, a functional annotation  
782 scheme for systematic classification of proteins from whole genomes. *Nucleic Acids Res*  
783 32: 5539-5545
- 784 Salogiannis J, Egan MJ, Reck-Peterson SL (2016) Peroxisomes move by hitchhiking on early  
785 endosomes using the novel linker protein PxdA. *The Journal of cell biology* 212: 289-296
- 786 Salogiannis J, Reck-Peterson SL (2016) Hitchhiking: a non-canonical mode of microtubule-  
787 based transport. *Trends in cell biology* 27: 141-150
- 788 Sen A, Cox RT (2016) Clueless is a conserved ribonucleoprotein that binds the ribosome at  
789 the mitochondrial outer membrane. *Biol Open* 5: 195-203
- 790 SenGupta DJ, Zhang B, Kraemer B, Pochart P, Fields S, Wickens M (1996) A three-hybrid  
791 system to detect RNA-protein interactions *in vivo*. *Proc Natl Acad Sci U S A* 93: 8496-  
792 8501
- 793 Shaner NC, Campbell RE, Steinbach PA, Giepmans BN, Palmer AE, Tsien RY (2004)  
794 Improved monomeric red, orange and yellow fluorescent proteins derived from  
795 *Discosoma* sp. red fluorescent protein. *Nat Biotechnol* 22: 1567-1572
- 796 Steinberg G (2014) Endocytosis and early endosome motility in filamentous fungi. *Curr Opin*  
797 *Microbiol* 20: 10-18
- 798 Straube A, Enard W, Berner A, Wedlich-Söldner R, Kahmann R, Steinberg G (2001) A split  
799 motor domain in a cytoplasmic dynein. *EMBO J* 20: 5091-5100
- 800 Van Nostrand EL, Pratt GA, Shishkin AA, Gelboin-Burkhart C, Fang MY, Sundararaman B,  
801 Blue SM, Nguyen TB, Surka C, Elkins K, Stanton R, Rigo F, Guttman M, Yeo GW  
802 (2016) Robust transcriptome-wide discovery of RNA-binding protein binding sites with  
803 enhanced CLIP (eCLIP). *Nature methods* 13: 508-514
- 804 Vollmeister E, Feldbrügge M (2010) Posttranscriptional control of growth and development in  
805 *Ustilago maydis*. *Curr Opin Microbio* 13: 693-699
- 806 Vollmeister E, Haag C, Zarnack K, Baumann S, König J, Mannhaupt G, Feldbrügge M (2009)  
807 Tandem KH domains of Khd4 recognize AUACCC and are essential for regulation of  
808 morphology as well as pathogenicity in *Ustilago maydis*. *RNA* 15: 2206-2218
- 809 Wu B, Eliscovich C, Yoon YJ, Singer RH (2016) Translation dynamics of single mRNAs in  
810 live cells and neurons. *Science* 352: 1430-1435
- 811 Yano T, Lopez de Quinto S, Matsui Y, Shevchenko A, Shevchenko A, Ephrussi A (2004)  
812 Hrp48, a *Drosophila* hnRNPA/B homolog, binds and regulates translation of oskar  
813 mRNA. *Dev Cell* 6: 637-648

- 814 Ying Y, Wang XJ, Vuong CK, Lin CH, Damianov A, Black DL (2017) Splicing activation by  
815 Rbfox requires self-aggregation through Its tyrosine-rich domain. *Cell* 170: 312-323 e10  
816 Zander S, Baumann S, Weidtkamp-Peters S, Feldbrügge M (2016) Endosomal assembly and  
817 transport of heteromeric septin complexes promote septin cytoskeleton formation. *J Cell*  
818 *Sci* 129: 2778-2792  
819 Zarnegar BJ, Flynn RA, Shen Y, Do BT, Chang HY, Khavari PA (2016) irCLIP platform for  
820 efficient characterization of protein-RNA interactions. *Nature methods* 13: 489-492  
821 Zhang Y, Chen Y, Gucek M, Xu H (2016) The mitochondrial outer membrane protein MDI  
822 promotes local protein synthesis and mtDNA replication. *EMBO J* 35: 1045-1057  
823 Zhu X, Buhner C, Wellmann S (2016) Cold-inducible proteins CIRP and RBM3, a unique  
824 couple with activities far beyond the cold. *Cellular and molecular life sciences : CMLS*  
825 73: 3839-3859  
826  
827

828 **Figures**

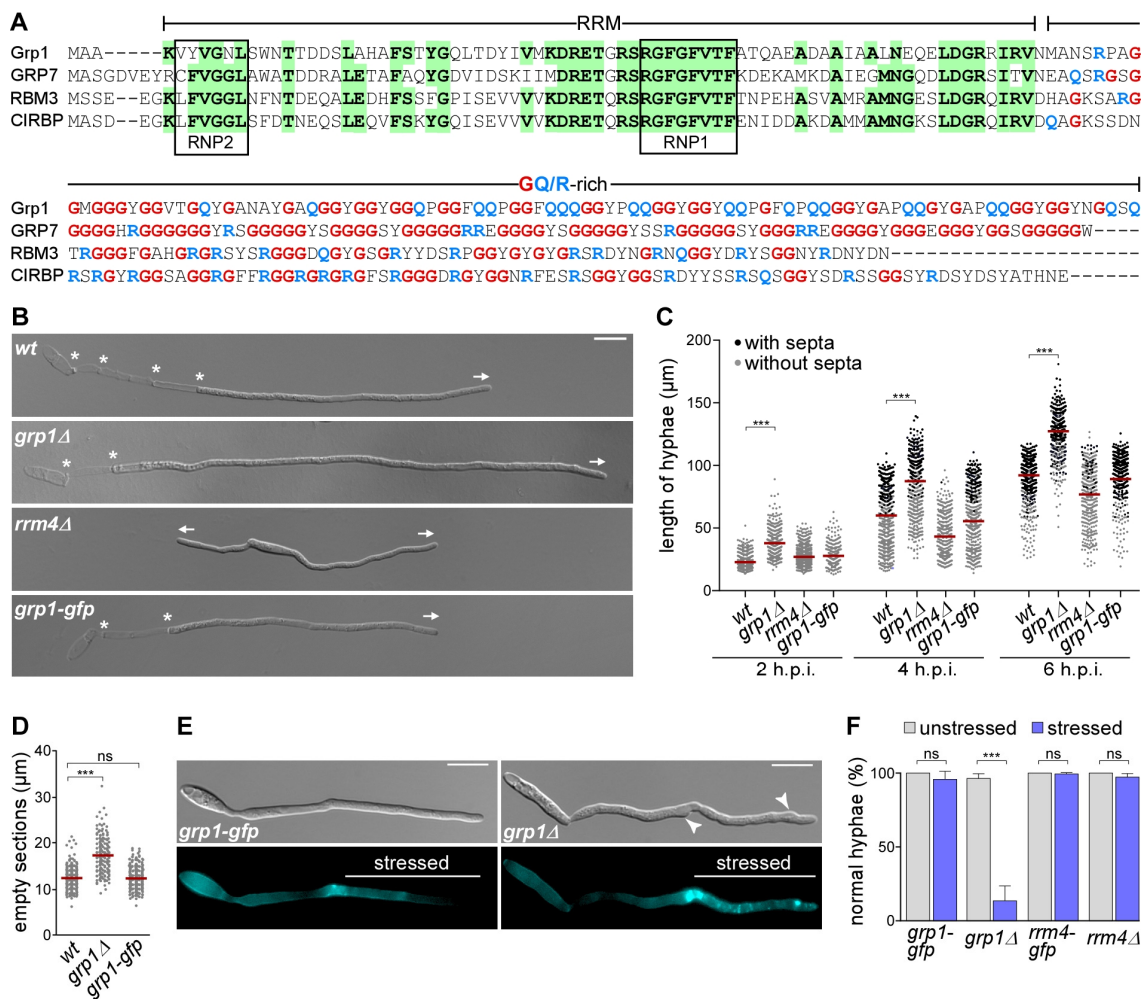

829

830 **Fig. 1. Grp1 is important for hyphal growth under suboptimal conditions.**

831 (A) Sequence alignment of glycine-rich proteins (Fig. S1B). *UmGrp1* from *U. maydis*  
 832 (UMAG\_02412), *AtGRP7* (RBG7) from *A. thaliana* (NC\_003071.7), *HsRBM3* and *HsCIRBP*  
 833 from *H. sapiens* (NC\_000023.11 and NC\_000019.10, respectively). Amino acid positions  
 834 within RRM that are identical in at least three proteins are highlighted in green (boxes  
 835 indicate RNA contact regions RNP1 and RNP2). Glycine and arginine/glutamine residues in  
 836 the glycine-rich region are labelled in red and blue, respectively. (B) Hyphae of AB33  
 837 derivatives (6 h.p.i.). Growth direction and basal septa are marked by arrows and asterisks,  
 838 respectively (size bar, 10 μm). (C) Hyphal length over time. Black and grey dots represent  
 839 hyphae with and without septa, respectively (median, red line; \*\*\*, p value < 0.0001; Mann-  
 840 Whitney U test). (D) Length of empty sections (see Fig. S1H); median, red line; n=3  
 841 independent experiments, > 100 hyphae analysed per experiment; \*\*\*, p value < 0.0001; ns,  
 842 not significant, p value ≥ 0.05; Mann-Whitney U test). (E) Differential interference contrast  
 843 (DIC, top) and fluorescence images (bottom) of AB33 hyphae (5 h.p.i.) stressed at 3 h.p.i.  
 844 with cell wall inhibitor CFW (2.5 μM). Arrowheads indicate aberrant cell wall deformation  
 845 (size bar, 10 μm). (F) Percentage of hyphae with normal cell walls with (stressed) and without  
 846 (unstressed) CFW (mean of 3 independent experiments, > 100 hyphae analysed per  
 847 experiment; error bars correspond to standard error of the mean, s.e.m.; \*\*\*, p value <  
 848 0.0001; ns, p value ≥ 0.05; unpaired Student's t-test).



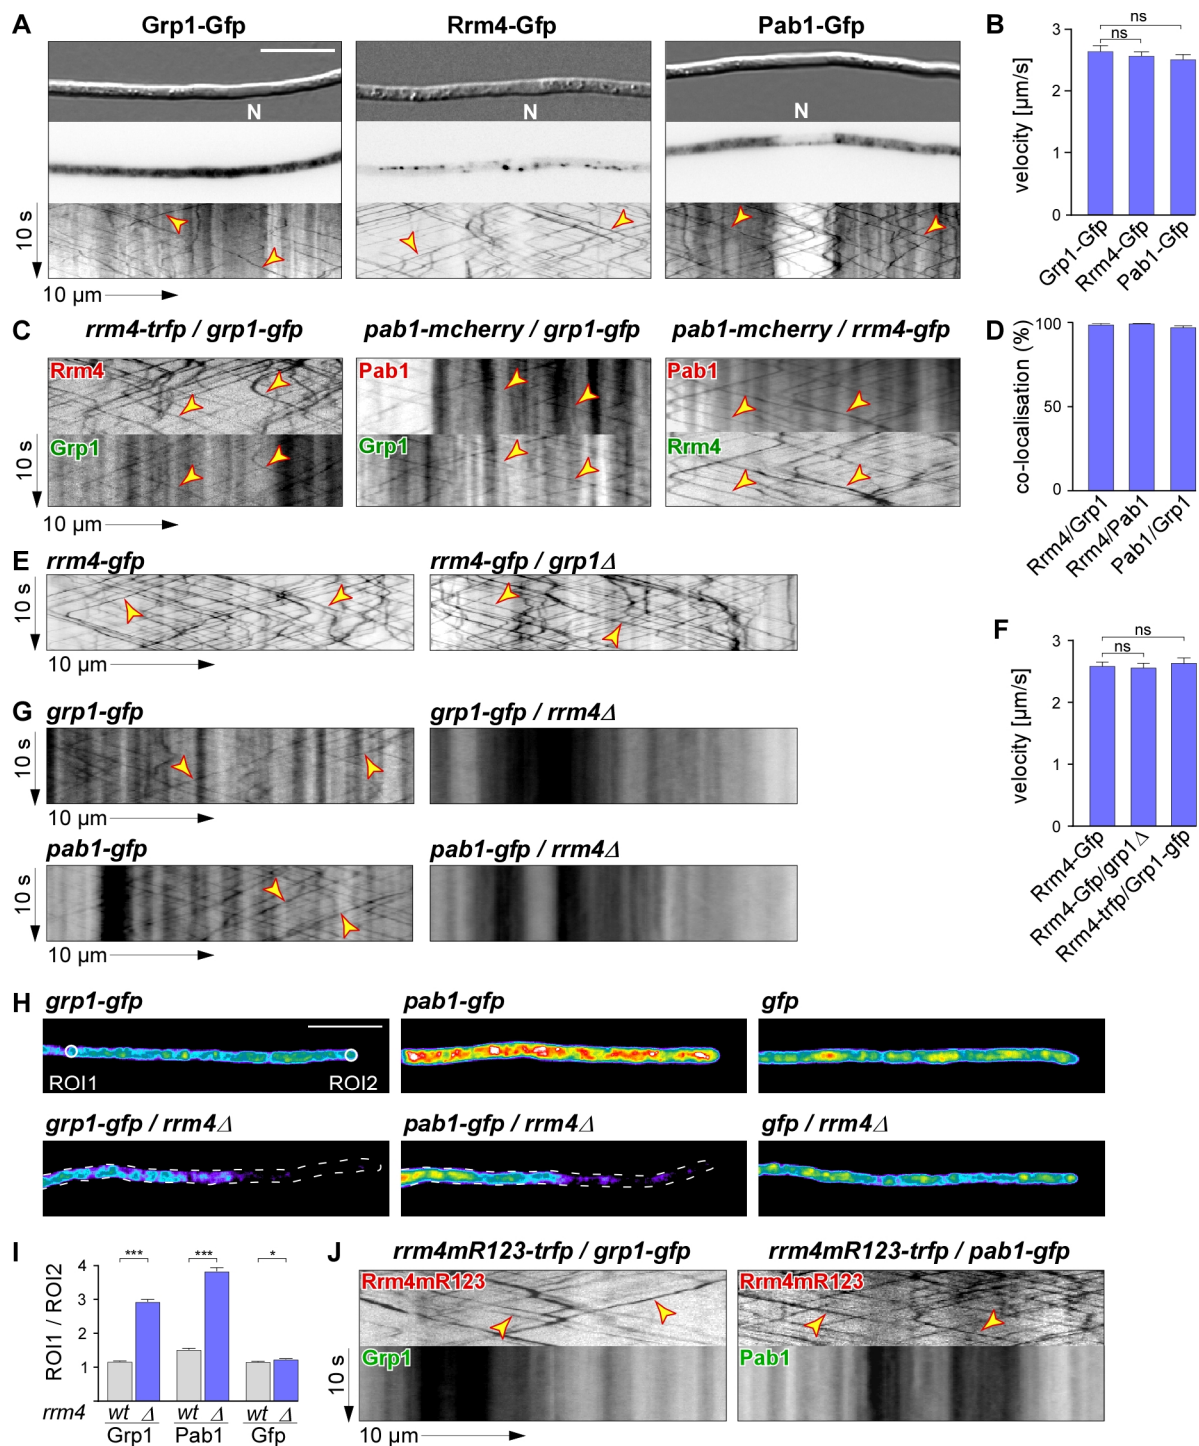

849

850 **Fig. 2. Grp1 shuttles on Rrm4-positive endosomes throughout hyphae.**

851 (A) Micrographs (DIC and inverted fluorescence image; size bar, 10  $\mu\text{m}$ ) and corresponding  
 852 kymographs of AB33 hyphae (6 h.p.i.) expressing Grp1-Gfp, Rrm4-Gfp or Pab1-Gfp (arrow  
 853 length on the left and bottom indicate time and distance, 10 s and 10  $\mu\text{m}$ , respectively).  
 854 Bidirectional movement is visible as diagonal lines (yellow arrowheads; N, nucleus;  
 855 Supplemental Video 1). For an example image of a complete AB33 hypha, see Fig. S1A. (B)  
 856 Bar diagram depicting velocity of fluorescent signals (velocity of tracks with > 5  $\mu\text{m}$   
 857 processive movement; mean and error bars, s.e.m.; n=3 independent experiments, 11 hyphae  
 858 analysed per experiment; ns, not significant, p value  $\geq 0.05$ ; unpaired Student's t-test). (C)  
 859 Kymographs of hyphae of AB33 derivatives (6 h.p.i.) expressing pairs of red and green

860 fluorescent proteins as indicated. Fluorescence signals were detected simultaneously using  
861 dual-view technology (arrow length as in A). Processive co-localising signals are marked by  
862 yellow arrowheads (Supplemental Videos 2-4). **(D)** Bar diagram depicting percentage of red  
863 fluorescent signals exhibiting co-localisation with the green fluorescent signal for strains  
864 shown in C (mean and error bars, s.e.m.; n=3 independent experiments, 11 hyphae each).  
865 **(E)** Kymographs comparing hyphae of AB33 derivatives (6 h.p.i.) expressing Rrm4-Gfp in  
866 the wild type (left) or *grp1Δ* strains (right) (processive signals marked by yellow arrowheads;  
867 arrow length on the left and bottom indicate time and distance, 10 s and 10 μm, respectively;  
868 Supplemental Video 5). **(F)** Velocity of fluorescent signals in kymographs of strains shown in  
869 E (velocity of tracks showing > 5 μm processive movement; mean and error bars, s.e.m.; n=3  
870 independent experiments, at least 10 hyphae per experiment; ns, not significant, p value  
871 ≥ 0.05; unpaired Student's t-test). **(G)** Kymographs comparing hyphae (6 h.p.i.) expressing  
872 Grp1-Gfp or Pab1-Gfp in wild type (left) with *rrm4Δ* strains (right; processive signals marked  
873 by yellow arrowheads; arrow length as in A). **(H)** Hyphal tips (4 h.p.i.) of AB33 derivatives  
874 expressing Grp1-Gfp, Pab1-Gfp or Gfp alone comparing wild type (top) with *rrm4Δ* strains  
875 (bottom). Fluorescence micrographs in false colours (black/blue to red/white, low to high  
876 intensities, respectively; size bar, 10 μm; ROI1 and ROI2-labelled circles exemplarily indicate  
877 regions-of-interest analysed in E). **(I)** Ratio of signal intensities in strains shown in H  
878 comparing Gfp fluorescence at the tip (ROI1) and in close vicinity to the nucleus (ROI2) (see  
879 Materials and methods; mean and error bars, s.e.m.; more than 150 hyphae were analysed for  
880 each strain; \*, p value < 0.01; \*\*\*, p value < 0.0001; Mann-Whitney U test). **(J)** Kymographs  
881 of hyphae of AB33 derivatives (6 h.p.i.) expressing pairs of red and green fluorescent proteins  
882 as indicated (arrow length as in A; Supplemental Videos 6-7). Fluorescence signals were  
883 detected simultaneously using dual-view technology. Processive co-localising signals are  
884 marked by yellow arrowheads. Note that processive movement is completely lost in the lower  
885 panels. Only static signals, visualised as vertical lines, are remaining.  
886

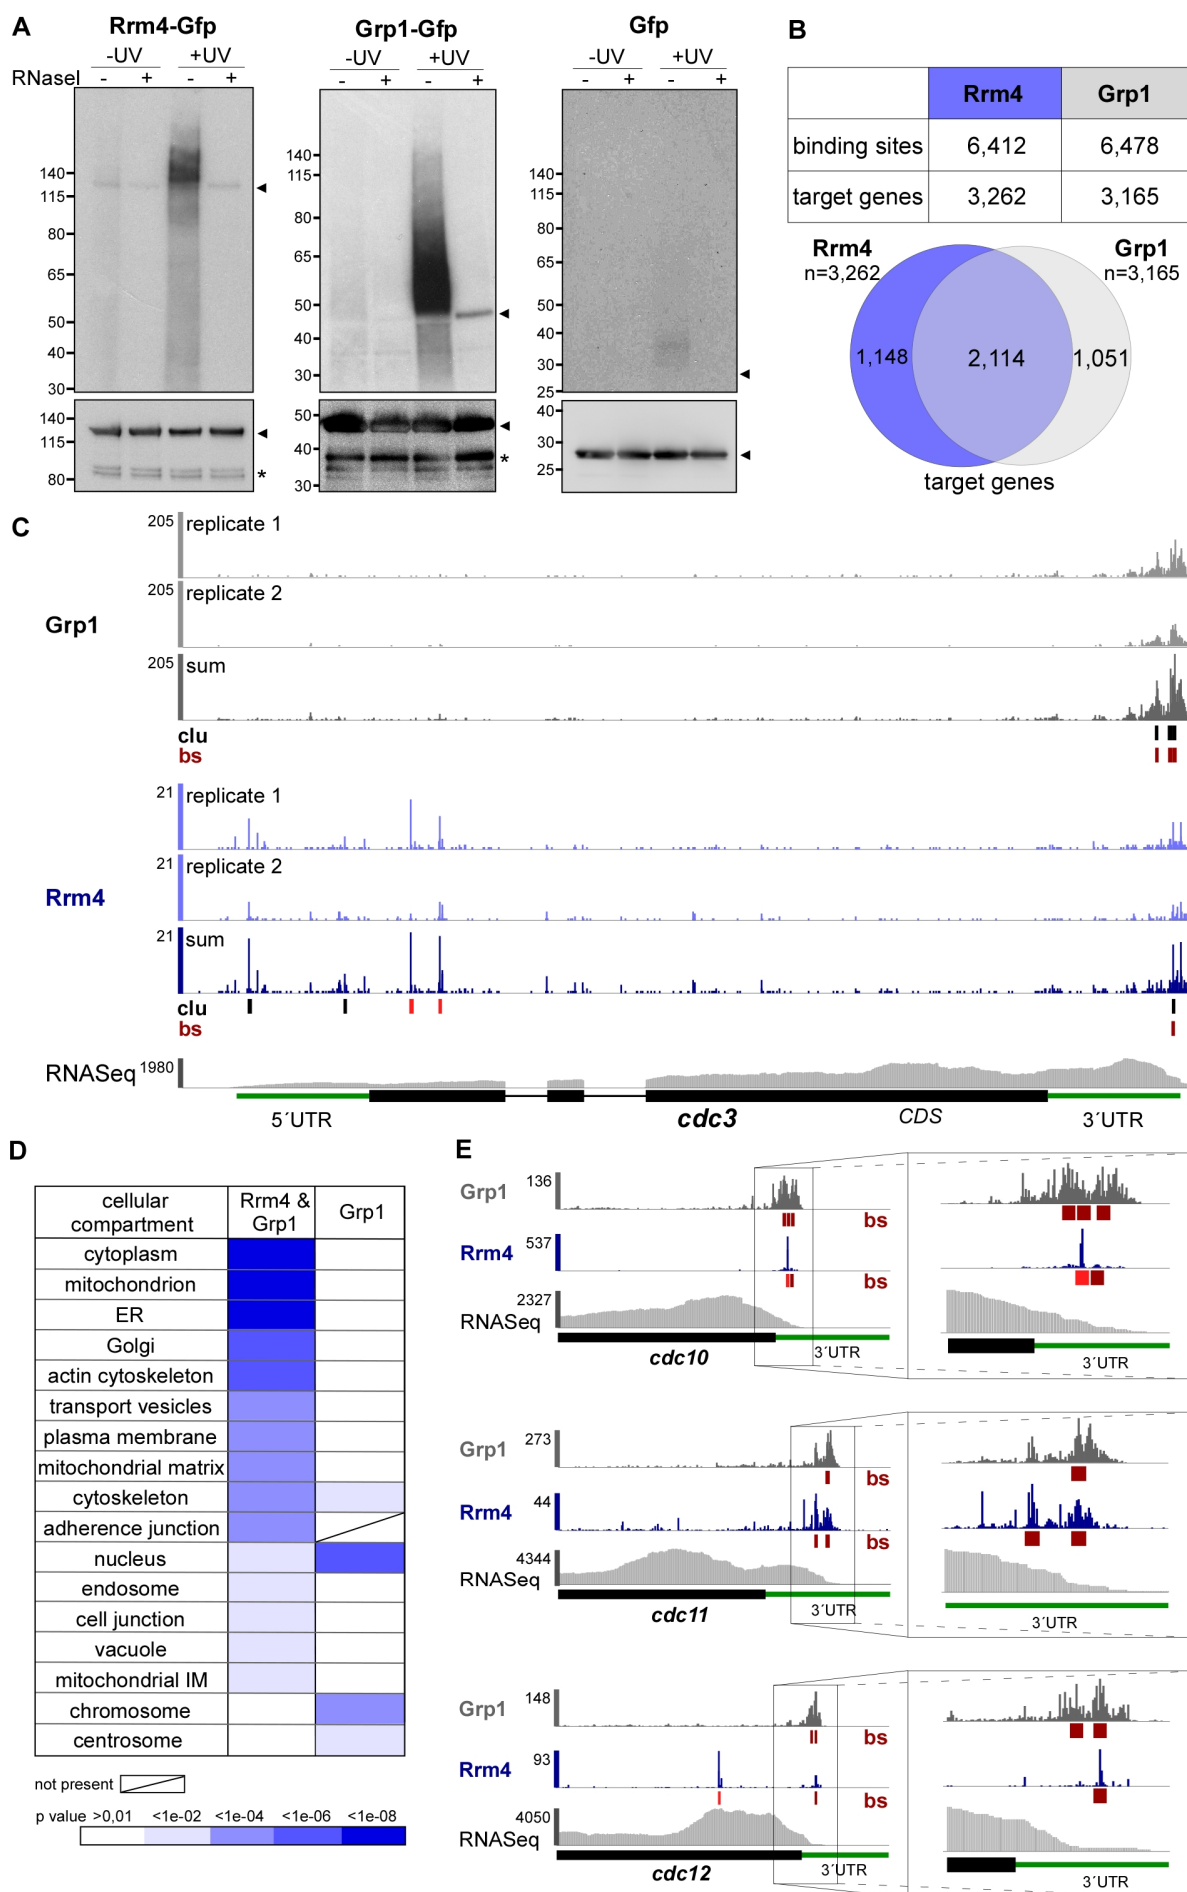

888 **Fig. 3. Rrm4 and Grp1 bind to thousands of target transcripts.**

889 (A) Autoradiograph and Western blot analyses for representative iCLIP experiments with  
890 Rrm4-Gfp, Grp1-Gfp and Gfp. Upper part: Upon radioactive labelling of co-purified RNAs,  
891 the protein-RNA complexes were size-separated in a denaturing polyacrylamide gel. Protein-  
892 RNA complexes are visible as smear above the size of the protein (Rrm4-Gfp, 112 kDa; Grp1-  
893 Gfp, 45 kDa; Gfp, 27 kDa; indicated by arrowheads on the right). Samples with and without  
894 UV-C irradiation and RNase I (1/10 dilution) are shown. Lower part: corresponding Western  
895 blot analysis using  $\alpha$ -Gfp antibody (arrowheads and asterisks indicate expected protein sizes  
896 and putative degradation products, respectively). (B) Summary of binding sites and target  
897 transcripts of Rrm4 and Grp1 (top). Venn diagram (below) illustrates the overlap of Rrm4 and  
898 Grp1 target transcripts. (C) iCLIP data for Rrm4 and Grp1 on *cdc3* (UMAG\_10503; crosslink  
899 events per nucleotide from two experimental replicates [light grey/light blue] and merged data  
900 [grey/blue] from AB33 filaments, 6 h.p.i.). Tracks below the merged iCLIP data show clusters  
901 of crosslink events (clu, black; orange indicates overlap with UAUG) and filtered binding  
902 sites for each protein (bs, red; top 25% binding sites for Rrm4 and Grp1 based on 'signal-  
903 over-background'; see Materials and methods). RNASeq coverage from wild type AB33  
904 filaments (6 h.p.i.) is shown for comparison. Gene model with exon/intron structure below  
905 was extended by 300 nt on either side to account for 5' and 3' UTRs (green). (D) Functional  
906 categories of cellular components (FunCat annotation scheme, Ruepp *et al.*, 2004) for proteins  
907 encoded by target transcripts that are shared between Rrm4 and Grp1 (left) or unique to Grp1  
908 (right). P values for the enrichment of the listed category terms are depicted by colour (see  
909 scale below). (E) iCLIP data (crosslink events from merged replicates) for Rrm4 (blue) and  
910 Grp1 (grey) as well as RNASeq coverage on selected target transcripts (*cdc10*,  
911 UMAG\_10644; *cdc11*, UMAG\_03449; *cdc12*, UMAG\_03599). Enlarged regions (indicated  
912 by boxes) of the 3' UTR (green) are shown on the right. Datasets and visualisation as in (C).  
913 Only filtered binding sites (bs) are shown (red; orange indicates overlap with UAUG).  
914

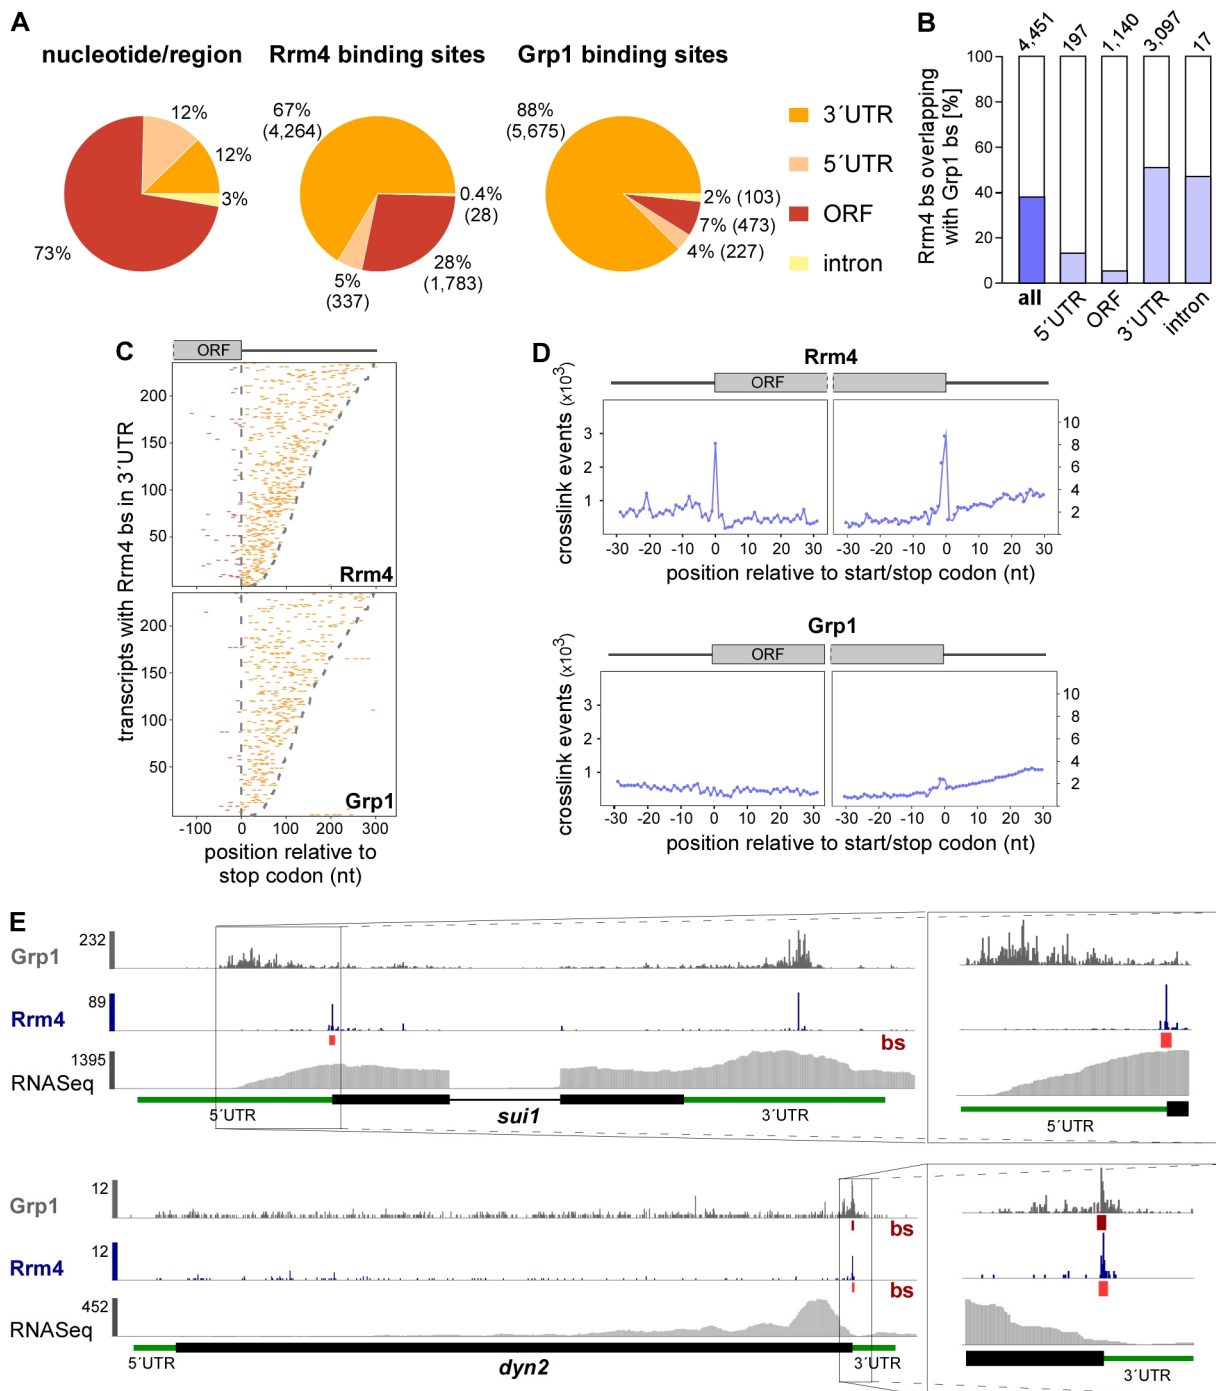

915

916 **Fig. 4. Rrm4 binds target transcripts at the start and stop codon.**

917 (A) Distribution of binding sites within different transcript regions: 5' UTR, 3' UTR, ORF  
 918 and intron. Percentage and absolute number of binding sites are given for each category. On  
 919 the left, a transcriptome-wide distribution of nucleotides per transcript region is shown for  
 920 comparison. (B) Percentage of Rrm4 binding sites (bs) overlapping with Grp1 bs within  
 921 shared target transcripts, shown for all bs and separated into transcript regions. The total  
 922 number of binding sites per category is indicated on top. (C) Positional maps of Rrm4 (top)  
 923 and Grp1 (bottom) bs relative to the stop codon (position 0). Binding sites in ORFs and  
 924 3' UTR are given in red and orange, respectively. 234 target transcripts were randomly  
 925 selected carrying an Rrm4 bs in the 3' UTR (with > 100 Rrm4 crosslink events; out of 1,715  
 926 Rrm4/Grp1 shared targets with Rrm4 bs in 3' UTR; Supplemental Table S6). (D) Metaprofiles  
 927 of Rrm4 (top) and Grp1 (bottom) crosslink events relative to the start and stop codon

928 (position 0). Note that crosslink events are substantially more frequent towards ORF ends,  
929 reflected in different y-axis scales. (E) Genome browser views of Rrm4 and Grp1 iCLIP  
930 events as well as RNASeq data of *sui1* (UMAG\_02665) and *dyn2* (UMAG\_04372).  
931 Visualisation as in Fig. 3C.  
932  
933

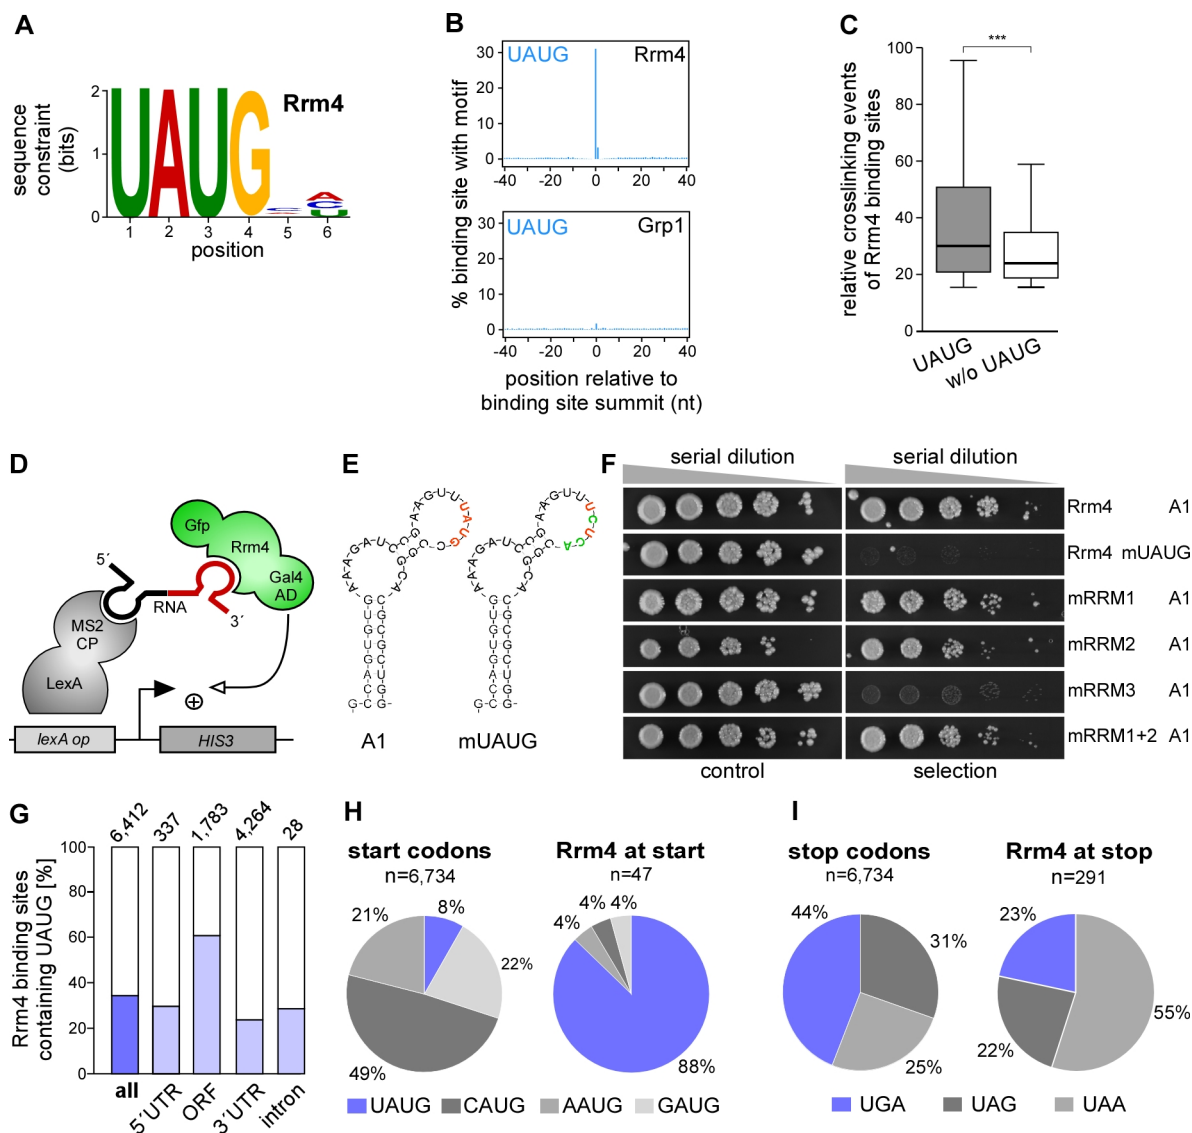

934

935 **Fig. 5. Rrm4 recognises UAUG *in vivo*.**

936 (A) Logo representation of the most enriched sequence motif at Rrm4 binding sites. At each  
 937 position, the height of the stack is proportional to the information content, while the relative  
 938 height of each nucleotide within the stack represents its relative frequency at this position. (B)  
 939 Frequency of the Rrm4 motif UAUG around Rrm4 and Grp1 binding sites. Shown is the  
 940 percentage of binding sites that harbour an UAUG starting at a given position in an 81-nt  
 941 window around the binding site summit. (C) Box plot comparing relative crosslinking  
 942 intensities (signal-over-background, SOB; see Materials and methods) of Rrm4 binding sites  
 943 with or without UAUG (\*\*\*) p value < 2.22e-16; unpaired Student's t-test). (D) Schematic  
 944 representation of the yeast three-hybrid system: *lexA* operator (*lexA op*) sequences are bound  
 945 by the LexA-MS2 coat protein (CP) hybrid (grey), recruiting the MS2-SELEX-RNA hybrid  
 946 (black and red, respectively) to the promoter region of the *HIS3* reporter gene. Transcription is  
 947 activated by binding of the third hybrid AD-Rrm4-Gfp (green) carrying a Gal4 activation  
 948 domain (AD). (E) RNA structure prediction of aptamer SELEX-A1 with UAUG (red) or the  
 949 mutated version mUAUG containing UCUC(A) (mutated bases in green). (F) Colony growth  
 950 on control and selection plates of yeast cells expressing protein and RNA hybrids indicated on  
 951 the right. RNA binding is scored by growth on selection plates (SC -his +3-AT, 3-amino-  
 952 1,2,4-triazole). mRRMx, Rrm4 variants harbouring mutations in RRM1, 2, 3 or 1 and 2. (G)

953 Percentage of Rrm4 bs containing the motif UAUG, shown for all bs and separated into  
954 transcript regions. Total number of binding sites is indicated on top. **(H)** Relative occurrence  
955 of NAUG sequence context for all (left) and Rrm4-bound (right) start codons. CAUG fits to  
956 the Kozak sequence in eukaryotes (Kozak, 2005). The fraction of UAUG coinciding with the  
957 Rrm4 recognition motif is shown in blue. This sequence context was strongly enriched among  
958 the Rrm4-bound target mRNAs, whereas it comprises only 8% of all annotated start codons in  
959 the *U. maydis* genome. **(I)** Relative contribution of the three stop codon variants to all (left)  
960 and Rrm4-bound stop codons (left). Although opal stop codons (UGA) fit best with a UAUG-  
961 containing binding site (UAUGA; present at 32 out of 63 bound UGA stop codons, 51%),  
962 they are depleted from Rrm4-bound stop codons.  
963



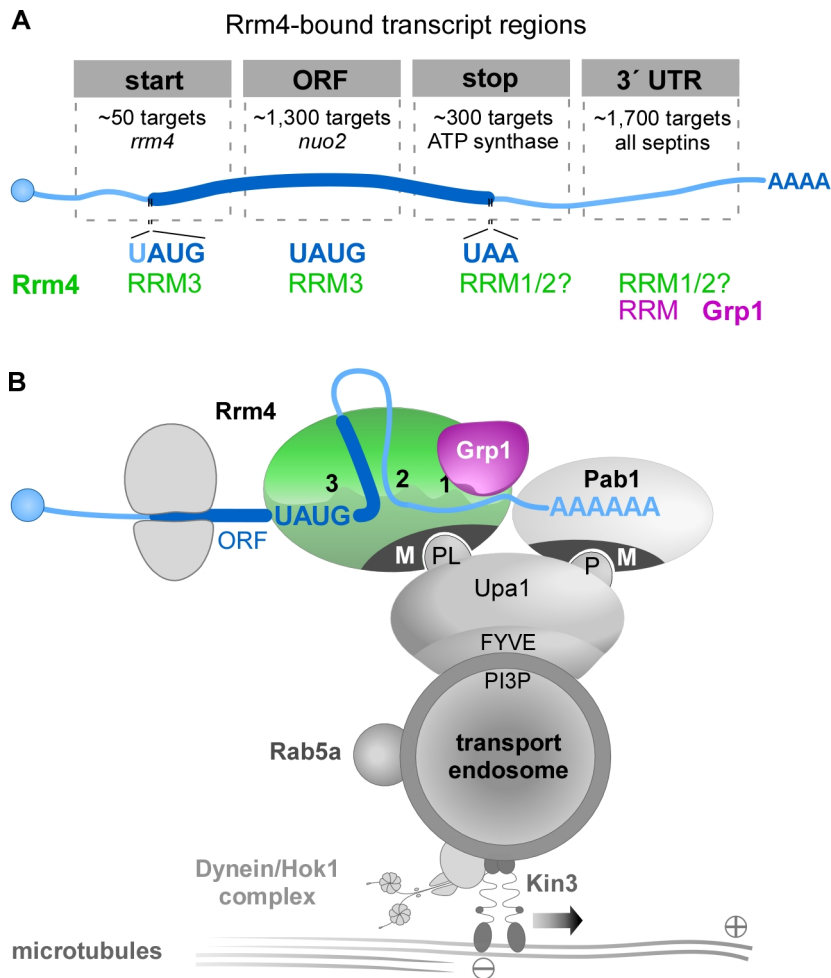

964

965 **Fig. 6. Model of Rrm4/Grp1-mediated endosomal mRNA transport**

966 (A) Schematic drawing of target transcript with Rrm4-bound regions on top (5' cap structure,  
 967 blue circle; 5' and 3' UTR, light blue; ORF, dark blue; poly(A) tail, AAAA). Different  
 968 categories of Rrm4 target transcripts were defined according to the presence of Rrm4 binding  
 969 sites at the start codon, within the ORF, at the stop codon and in the 3' UTR. Approximate  
 970 number of target transcripts and selected examples are given for each category. About 900 of  
 971 1,300 target transcripts with an Rrm4 binding site in the ORF harbour an UAUG motif within  
 972 the ORF binding site. Potential RRM domains of Rrm4 and Grp1 that may mediate RNA  
 973 binding in the different transcript regions are given in green and magenta, respectively. (B)  
 974 Model proposing the spatial arrangement of endosomal RBPs with bound target transcripts.  
 975 The three RRM domains of Rrm4 are schematically displayed and labelled by numbers  
 976 (FYVE zinc finger domain; PI3P, phosphatidylinositol 3-phosphate; M, Mademoiselle  
 977 domain; P and PL, PAM2 and PAM2-like sequence, respectively; further details, see text).  
 978

979 **Supplemental Figures**

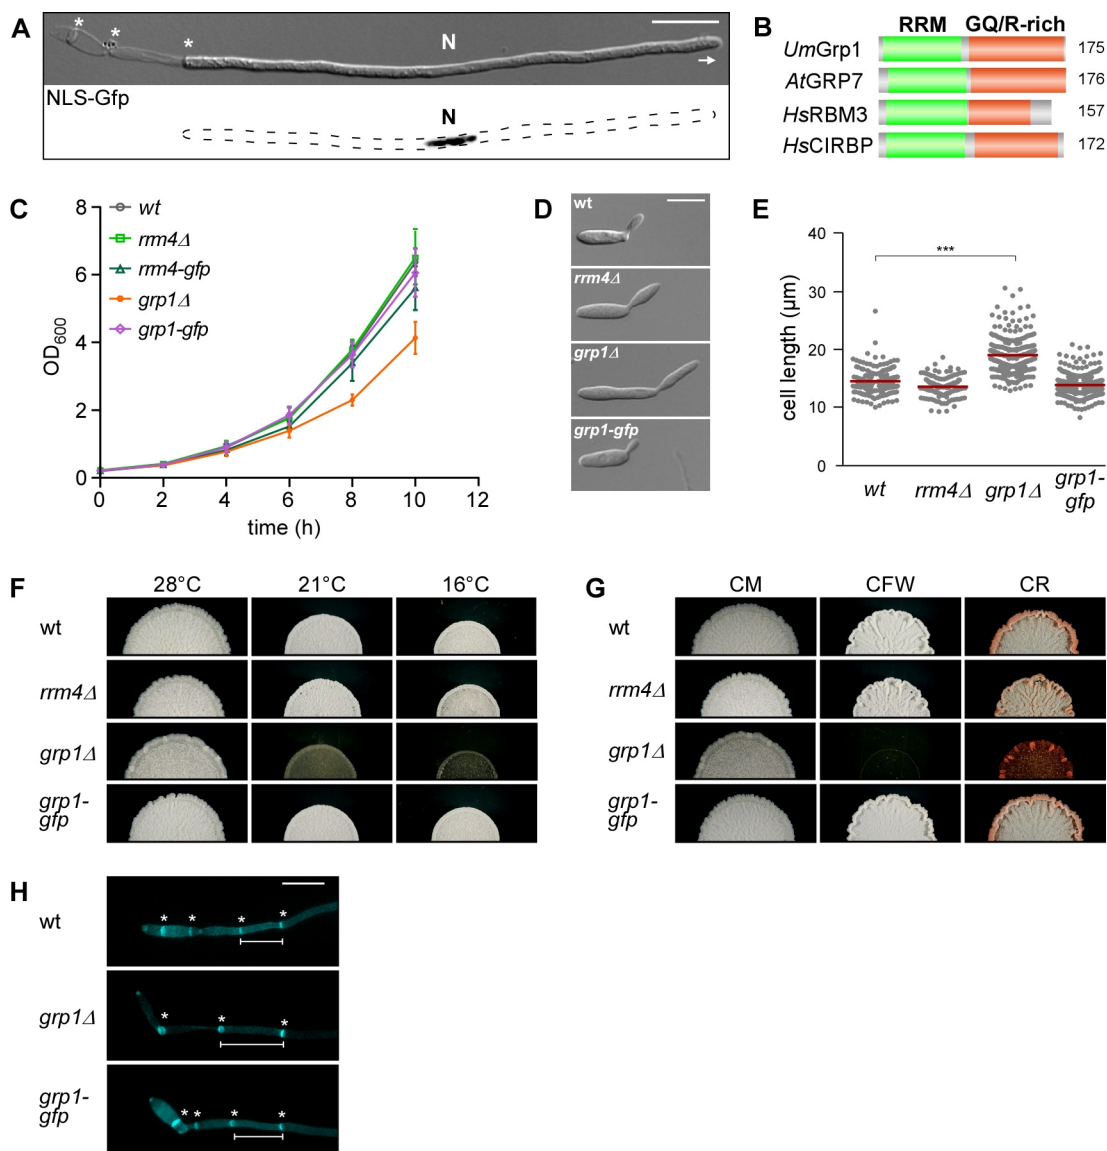

980

981 **Fig. S1. Loss of Grp1 causes defects in cell growth.**

982 (A) Hyphal form (6 hours post induction, h.p.i.) of laboratory strain AB33 expressing a Gfp-  
 983 tagged protein with nuclear localisation signal to stain the nucleus (N; λN-NLS-Gfp, phage  
 984 protein λN fused to triple Gfp, containing a nuclear localisation signal; inverted fluorescence  
 985 image shown; size bar, 10 μm). Hyphae expand at the apical pole (arrow) and insert septa  
 986 (asterisks) at the basal pole in regular time intervals resulting in the formation of empty  
 987 sections. (B) Schematic representation of the domain architecture of four small glycine-rich  
 988 proteins (RRM, RNA recognition motif, green; GQ/R, glycine-rich region with arginine or  
 989 glutamine, red). *UmGrp1* from *U. maydis* (UMAG\_02412), *AtGRP7* from *Arabidopsis*  
 990 *thaliana* (RBG7; NC\_003071.7), *HsRBM3* and *HsCIRBP* from *Homo sapiens*  
 991 (NC\_000023.11 and NC\_000019.10, respectively). Number of amino acids indicated on the  
 992 right. (C) Growth curve of indicated AB33 derivatives growing in liquid culture. (D)  
 993 Differential interference contrast (DIC) images of AB33 derivatives as yeast-like budding  
 994 cells (size bar, 10 μm). (E) Cell length of budding cells (median, red line; n=3 independent  
 995 experiments, more than 40 cells per experiment; \*\*\*, p value < 0.0001; Mann–Whitney U  
 996 test). (F) Colonies of indicated AB33 strains grown in the yeast form incubated at different

997 temperatures (28°C for 1 d or 16°C and 21°C for 5 d). **(G)** Colonies of indicated AB33 strains  
998 grown in the yeast form. Incubated plates contained cell wall inhibitors (CM, complete  
999 medium for 1 d; CFW, 50 µM Calcofluor White for 4 d; CR, 57.4 µM Congo Red for 4 d).  
1000 **(H)** Fluorescence images of the basal pole of hyphae of AB33 derivatives (6 h.p.i.). Septa  
1001 (asterisks) were stained with CFW. White bars indicate exemplary length measurements of  
1002 empty sections shown in Fig. 1D (size bar, 10 µm).  
1003

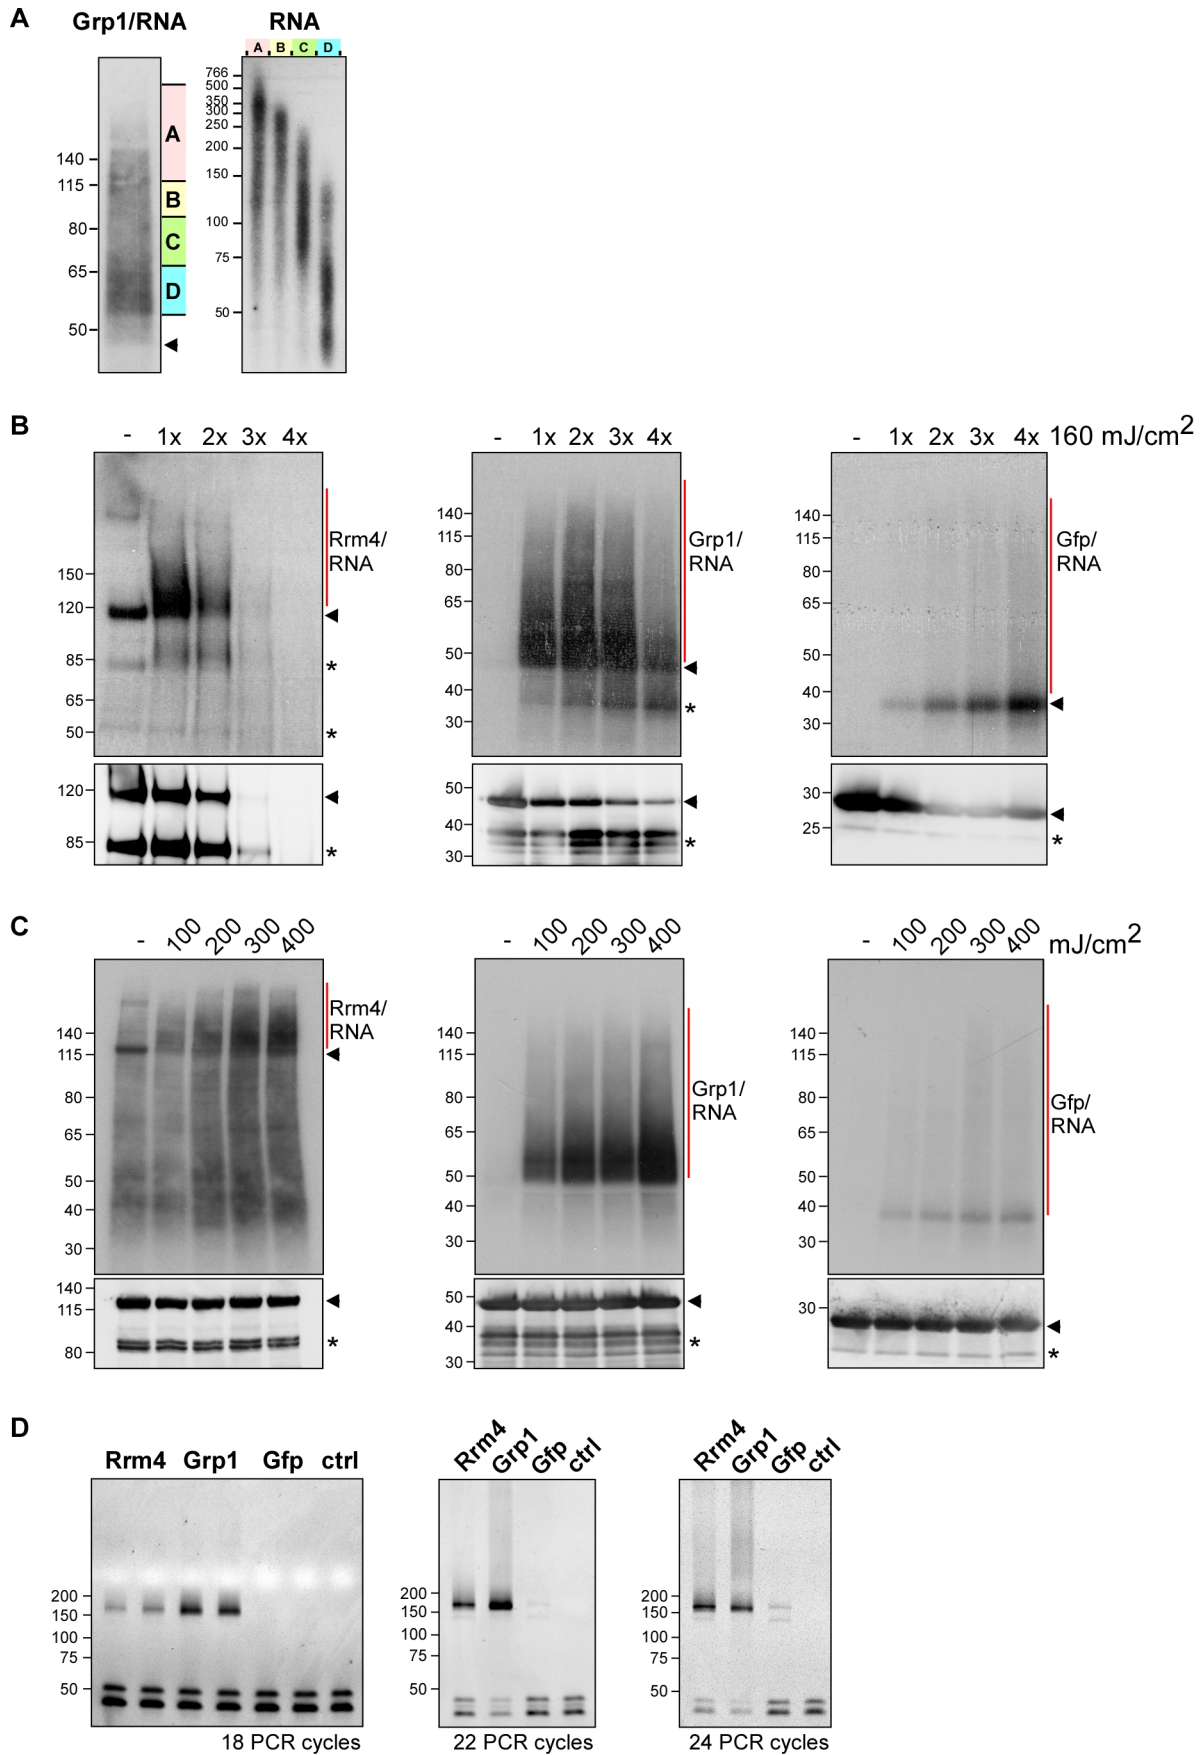

1005 **Fig. S2 Improving the iCLIP protocol for fungal RBPs.**

1006 (A) Grp1-Gfp/RNA complexes were size-separated on denaturing PAGE after UV-C  
1007 irradiation and transferred to a nitrocellulose membrane (left). RNA was radioactively  
1008 labelled, and protein-RNA complexes with covalently linked RNAs of different sizes were  
1009 visible as smear above the expected molecular weight of the Grp1-Gfp protein (45 kDa;  
1010 marked by arrowhead). RNA of four different regions of the membrane (A to D indicated on  
1011 the right) were isolated from the membrane and size separated on a denaturing gel (6%)  
1012 (right; nucleotide size marker on the left, bp). (B) Autoradiographs showing Rrm4-Gfp, Grp1-  
1013 Gfp and Gfp in complex with RNA after UV-C irradiation at 0, 160, 320, 480 and 640  
1014 mJ/cm<sup>2</sup>. Corresponding Western blots using anti-Gfp are shown below. Arrowheads indicate  
1015 the expected molecular weight of the proteins (Rrm4-Gfp, 112 kDa; Grp1-Gfp, 45 kDa; Gfp,  
1016 27 kDa). After each irradiation step, the cells were mixed. Note that increased UV-C  
1017 irradiation in combination with slow processing due to long time intervals was particularly  
1018 harmful for the Rrm4 protein, which was completely degraded after four minutes of UV-C  
1019 irradiation. (C) Autoradiographs showing Rrm4-Gfp, Grp1-Gfp and Gfp in complex with  
1020 RNA after single UV-C irradiation at 0, 100, 200, 300 or 400 mJ/cm<sup>2</sup>. This time, mixing  
1021 breaks were omitted and cells were harvested as quickly as possible. Corresponding Western  
1022 blots are shown below. Labelling as above. (D) Amplification of the Rrm4, Grp1 and Gfp  
1023 derived cDNA libraries with different numbers of PCR cycles (between 18 and 24; ctrl,  
1024 control without template cDNA). The PCR products were separated on a native gel (6%) and  
1025 stained with SYBR green I (nucleotide size marker on the left, bp). The size of the cDNA  
1026 insert together with the adapters (cDNA insert = 20-30 nt; L3 adapter, RT-primer and P3/P5  
1027 Solexa primers = 128 nt) is expected to be ~ 150-160 nt after amplification.  
1028

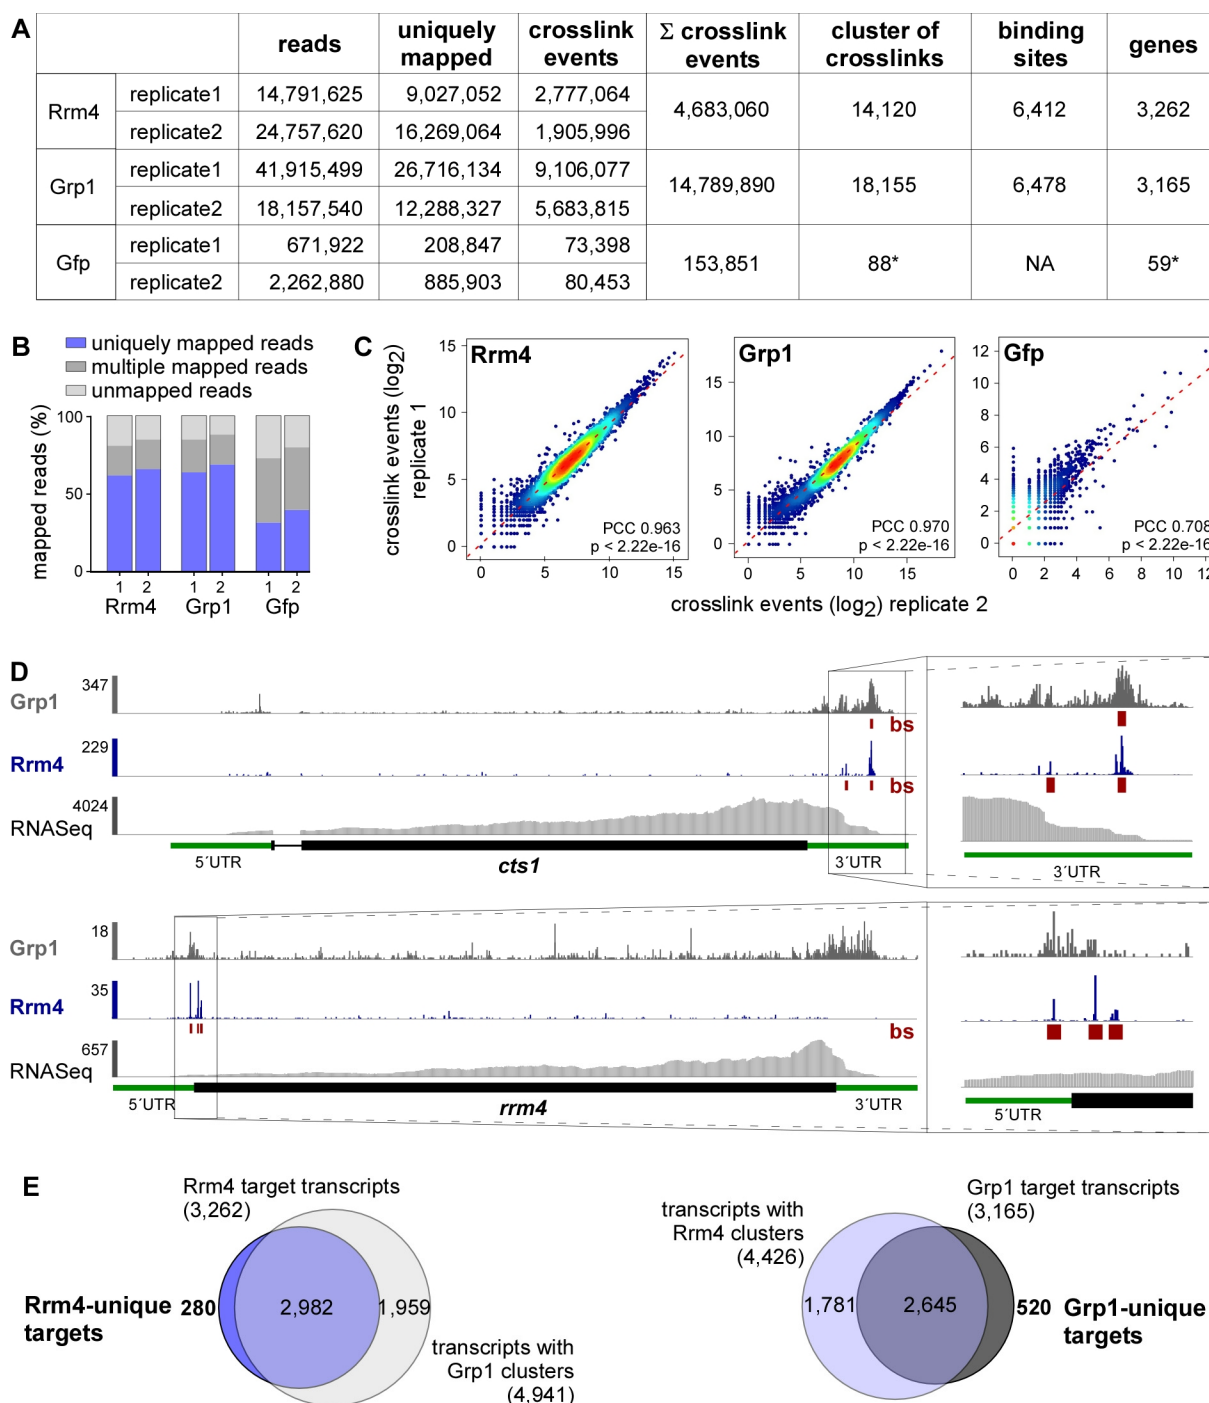

1029

1030 **Fig. S3. Comparative iCLIP procedure results in high-quality dataset.**

1031 (A) Summary of the iCLIP libraries including initial number of sequencing reads, uniquely  
 1032 mapped reads, crosslink events (xlinks) for both replicates for Rrm4, Grp1 and Gfp. In  
 1033 addition, sum of crosslink events as well as resulting binding sites and target transcripts are  
 1034 given for merged replicates. \*, Gfp binding sites were only filtered for reproducibility but not  
 1035 for relative signal intensity (SOB; see Material and methods). (B) Stacked bar chart showing  
 1036 percentage of reads mapping to a unique, multiple (multiple mapping) or no location  
 1037 (unmapped) in the *U. maydis* genome for Rrm4, Grp1 and Gfp. (C) Scatter plot comparing  
 1038 number of crosslink events per gene from two independent replicate experiments for Rrm4,  
 1039 Grp1 and Gfp (PCC, Pearson correlation coefficient). (D) Genome browser views of Rrm4  
 1040 and Grp1 iCLIP events as well as RNaseq data of *cts1* (UMAG\_10419) and *rrm4*

1041 (UMAG\_10836). Visualisation as in Fig. 3C. **(E)** Venn diagram to identify target transcripts  
1042 that are uniquely bound by Rrm4 (left) or Grp1 (right). Unique target transcripts (numbers  
1043 given in bold) are selected only if they show no evidence of binding by the other RBP  
1044 (considering all crosslink clusters, see Materials and methods).  
1045

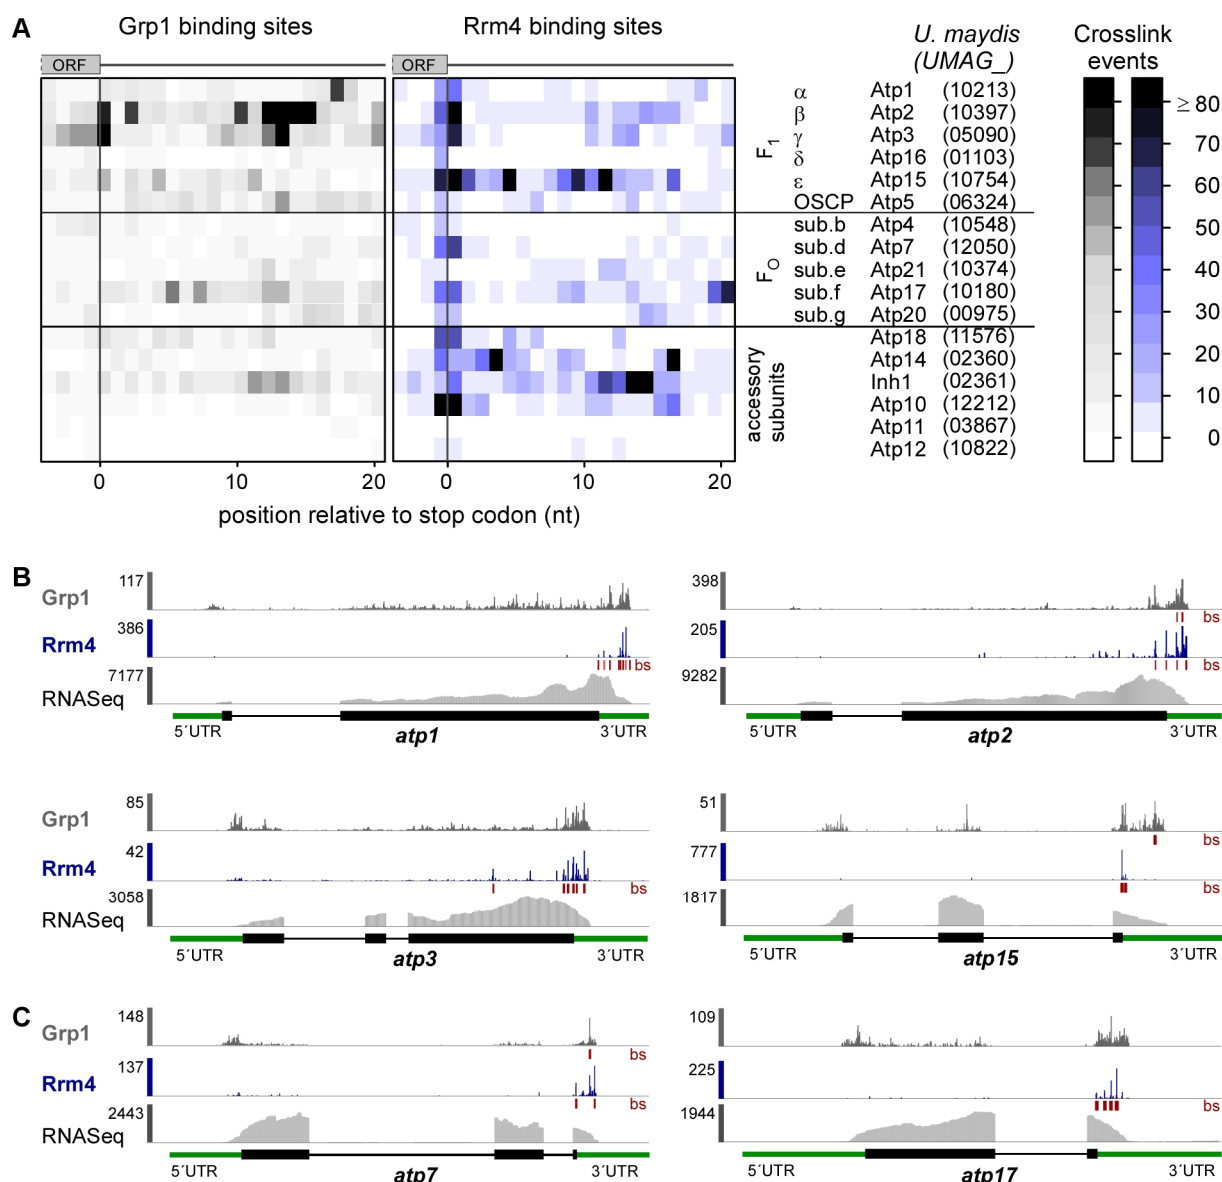

1046

1047 **Fig. S4. Accumulation of crosslink events at stop codons of mRNAs encoding subunits of**  
 1048 **the mitochondrial  $F_0F_1$ -ATPase.**

1049 (A) Heatmap of crosslink events of Grp1 (left) and Rrm4 (right) in a window around the stop  
 1050 codons (position 0 = first position of 3' UTR) of mRNAs encoding subunits of the  
 1051 mitochondrial  $F_0F_1$ -ATPase (nomenclature and gene identifiers for *U. maydis* on the right).  
 1052 Crosslink events per nucleotide are represented by a colour scale (right). (B,C) iCLIP data of  
 1053 Rrm4 and Grp1 as well as RNaseq data across selected mRNAs of the  $F_1$  subcomplex (B)  
 1054 and  $F_0$  subcomplex (C) that carry an Rrm4 binding site precisely at the stop codon.  
 1055 Visualisation as in Fig. 3C.

1056



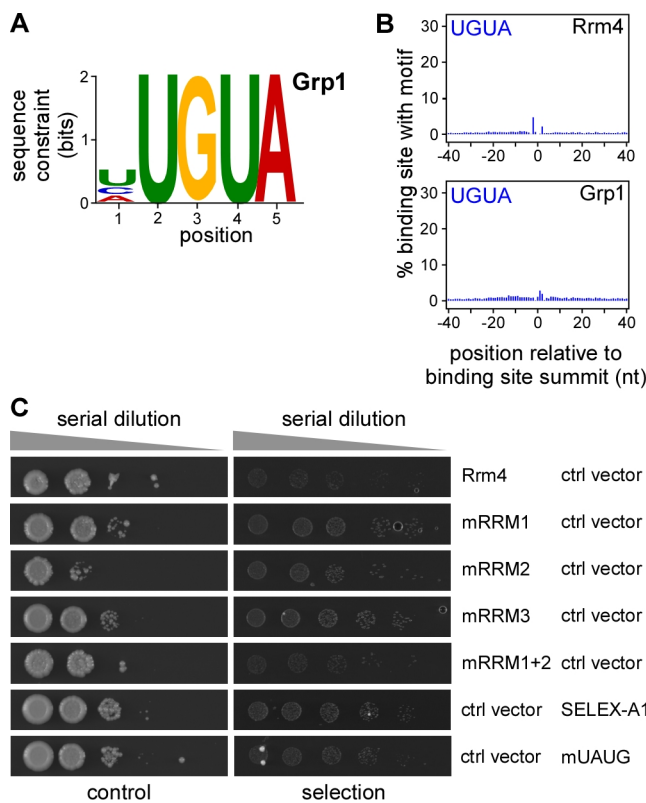

1057

1058 **Fig. S5. Control experiments for the yeast three-hybrid analysis.**

1059 (A) Logo representation of the most enriched sequence motif at Grp1 binding sites. At each  
1060 position, the height of the stack is proportional to the information content, while the relative  
1061 height of each nucleotide within the stack represents its relative frequency at this position. (B)  
1062 Frequency of UGUA around Rrm4 and Grp1 binding sites. Shown is the percentage of  
1063 binding sites that harbour an UGUA starting at a given position in an 81-nt window around  
1064 the binding site summit. Representation as in Fig. 5B. (C) Colony growth on control and  
1065 selection plates of yeast cells expressing protein and RNA hybrids indicated on the right.  
1066 RNA binding is scored by growth on selection plates (SC -his +3-AT, 3-amino-1,2,4-triazole).  
1067 This control experiment demonstrates that growth on selection plates (see Fig. 5F) depends  
1068 the presence of Rrm4 variant and cognate hybrid RNA. mRRMx, Rrm4 variants harbouring  
1069 mutations in RRM 1, 2, 3 or 1 and 2.

1070

1071 **Supplemental Tables**

1072 **Supplemental Table S1: Shared target transcripts that are bound by Rrm4 and Grp1.**

1073 List of 2,114 target transcripts that harbour at least one binding site of Rrm4 and Grp1 as  
1074 shown in Fig. 3B. Binding sites were assigned to distinct transcript regions, applying the  
1075 following hierarchy to resolve overlapping annotation: 3' UTR > 5' UTR > exon > intron.

1076

1077 **Supplemental Table S2: Grp1-unique target transcripts that are only bound by Grp1.**

1078 List of 520 target transcripts that harbour at least one Grp1 binding site, but no Rrm4 binding  
1079 site (subtracting the full set of unfiltered Rrm4 crosslink clusters as shown in Fig. S3E; see  
1080 Materials and methods). Binding sites were assigned to distinct transcript regions, applying  
1081 the following hierarchy to resolve overlapping annotation: 3' UTR > 5' UTR > exon > intron.

1082

1083 **Supplemental Table S3: Rrm4-unique targets that are only bound by Rrm4.** List of 280

1084 target transcripts that harbour at least one Rrm4 binding site, but no Grp1 binding site  
1085 (subtracting the full set of Grp1 crosslink clusters as shown in Fig. S3E; see Materials and  
1086 methods). Binding sites were assigned to distinct transcript regions, applying the following  
1087 hierarchy to resolve overlapping annotation: 3' UTR > 5' UTR > exon > intron.

1088

1089 **Supplemental Table S4: Target transcripts with an Rrm4 binding site at the start codon.**

1090 List of 47 target transcripts that harbour an Rrm4 binding site precisely overlapping the start  
1091 codon. The NAUG sequence context is given for each Rrm4-bound start codon (as shown in  
1092 Fig. 5H). CAUG fits to the Kozak sequence in eukaryotes, while UAUG represents the Rrm4  
1093 recognition motif.

1094

1095 **Supplemental Table S5: Target transcripts with an Rrm4 binding site at the stop codon.**

1096 List of 291 target transcripts that harbour an Rrm4 binding site precisely overlapping the stop

1097 codon. For each transcript, the type of stop codon is given. Rrm4 predominantly binds to  
1098 UAA stop codons (as shown in Fig. 5I).

1099

1100 **Supplemental Table S6: Selected target transcripts with Rrm4 binding sites in the 3'**  
1101 **UTR that are shown in Fig. 4C.** For the positional maps in Fig. 4C, 234 target transcripts  
1102 were randomly selected carrying an Rrm4 binding site in the 3' UTR (with > 100 Rrm4  
1103 crosslink events; out of 1,715 Rrm4/Grp1 shared targets with Rrm4 binding site in 3' UTR;  
1104 Supplemental Table S1). For each target transcript, UMAG identifier, functional description  
1105 and genomic coordinates of the annotated ORF are given together with the genomic  
1106 coordinate of the manually annotated end position of the 3' UTR (according to RNASeq  
1107 coverage; see Materials and methods).

1108

1109 **Supplemental Table S7: *U. maydis* strains used in this study.** eGfp, enhanced Gfp. UMa,  
1110 internal reference number.

1111 **Supplemental Table S8: *U. maydis* strains generated in this study.** UMa and pUMa,  
1112 internal reference numbers for strains and plasmids, respectively.

1113 **Supplemental Table S9: Plasmids generated in this study for *U. maydis*.** pUMa, internal  
1114 plasmid reference number.

1115 **Supplemental Table S10: Plasmids used for yeast three-hybrid system.** pUMa, internal  
1116 plasmid reference number.

1117

1118

1119 **Legends to Supplemental Videos**

1120 **Supplemental Video 1**

1121 Grp1-Gfp shuttles like Rrm4- and Pab1-positive endosomes in hyphae (central part shown,  
1122 hyphal tip towards the right; N, nucleus; scale bar, 10  $\mu$ m; timescale in seconds, 150 ms  
1123 exposure time, 150 frames, 6 frames/s display rate, MPEG-4 format, 1660 kB; corresponds to  
1124 Fig. 2A).

1125

1126 **Supplemental Video 2**

1127 Processive Grp1-Gfp signals co-migrate with Rrm4-tRfp in hyphae (central part shown,  
1128 hyphal tip towards the right; scale bar, 10  $\mu$ m; timescale in seconds, 150 ms exposure time, 67  
1129 frames, 6 frames/s display rate; MPEG-4 format, 738 kB; corresponds to Fig. 2C).

1130

1131 **Supplemental Video 3**

1132 Processive Grp1-Gfp signals co-migrate with Pab1-mCherry in hyphae (central part shown,  
1133 hyphal tip towards the right; scale bar, 10  $\mu$ m; timescale in seconds, 150 ms exposure time, 67  
1134 frames, x6 frames/s display rate; MPEG-4 format, 657 kB; corresponds to Fig. 2C).

1135

1136 **Supplemental Video 4**

1137 Processive Rrm4-Gfp signals co-migrate with Pab1-mCherry in hyphae (central part shown,  
1138 hyphal tip towards the right; scale bar, 10  $\mu$ m; timescale in seconds, 150 ms exposure time, 67  
1139 frames, 6 frames/s display rate; MPEG-4 format, 738 kB; corresponds to Fig. 2C).

1140

1141 **Supplemental Video 5**

1142 Shuttling of Rrm4 is independent of Grp1 (wild type hypha top, *grp1* $\Delta$  hypha bottom; scale  
1143 bar, 10  $\mu$ m; timescale in seconds, 150 ms exposure time, 67 frames, 6 frames/s display rate;  
1144 MPEG-4 format, 580 kB; corresponds to Fig. 3A).

1145 **Supplemental Video 6**

1146 Shuttling of Grp1-Gfp depends on RNA binding capacity of Rrm4 (hypha expressing  
1147 Rrm4mR123-tRfp, with point mutations in RRM domains 1, 2 and 3 as well as Grp1-Gfp, top

1148 and bottom, respectively; scale bar, 10  $\mu\text{m}$ ; timescale in seconds, 150 ms exposure time, 67  
1149 frames, 6 frames/s display rate; MPEG-4 format, 1086 kB; corresponds to Fig. 3F).

1150

1151 **Supplemental Video 7**

1152 Shuttling of Pab1-Gfp depends on RNA binding capacity of Rrm4 (hypha expressing  
1153 Rrm4mR123-tRfp, with point mutations in RRM domains 1, 2 and 3 as well as Pab1-Gfp, top  
1154 and bottom, respectively; scale bar, 10  $\mu\text{m}$ ; timescale in seconds, 150 ms exposure time, 67  
1155 frames, 6 frames/s display rate; MPEG-4 format, 1305 kB; corresponds to Fig. 3F).

1156
